# Supplementary material for: Recommended motor assessments based on psychometric properties in individuals with dementia: a systematic review
Source: Springer Nature journal article supplement (doi:10.1186/s11556-019-0228-z), 2019-11-03
Supplement: MOESM1 [file 17344490]

## **Additional file 1**

### **Search term first search**

Details of the search strategy used in Pubmed are provided below. This search was modified as appropriate for other databases. All fields were searched for MeSH and free search terms:

- |                              |                        |
|------------------------------|------------------------|
| 1. dementia                  | 12. fitness            |
| 2. "Alzheimer disease"       | 13. "physical fitness" |
| 3. "Vascular dementia"       | 14. balance            |
| 4. or/1-3                    | 15. equilibrium        |
| 5. "physical activity"       | 16. gait               |
| 6. "motor activity"          | 17. mobility           |
| 7. exercise                  | 18. strength           |
| 8. "physical training"       | 19. flexibility        |
| 9. training                  | 20. endurance          |
| 10. or/5-9                   | 21. or/11-20           |
| 11. "functional performance" | 22. 4 and 10 and 21    |
