# Supplementary material for: Recommended motor assessments based on psychometric properties in individuals with dementia: a systematic review
Source: Springer Nature journal article supplement (doi:10.1186/s11556-019-0228-z), 2019-11-03
Supplement: MOESM2 [file 17344490]

## Additional file 2

### Formulas for calculating time\*group interaction effect sizes

$$d = \sqrt{F \left( \frac{n_{IG} + n_{CG}}{n_{IG} * n_{CG}} \right) * \left( \frac{n_{IG} + n_{CG}}{n_{IG} + n_{CG} - 2} \right)}$$

$$d = t \sqrt{\left( \frac{n_{IG} + n_{CG}}{n_{IG} * n_{CG}} \right) * \left( \frac{n_{IG} + n_{CG}}{n_{IG} + n_{CG} - 2} \right)}$$

$$d = \frac{mean_{DIFF IG} - mean_{DIFF CG}}{\sqrt{\frac{(n_{IG} - 1) * SD_{DIFF IG}^2 + (n_{CG} - 1) * SD_{DIFF CG}^2}{n_{IG} + n_{CG}}}}$$

with d=Cohen's d effect size, F=F statistic,  $mean_{DIFF CG}$ =baseline-post mean difference in control group,  $mean_{DIFF IG}$ =baseline-post mean difference in intervention group,  $n_{CG}$ =number of subjects in control group,  $n_{IG}$ = number of subjects in intervention group,  $SD_{DIFF CG}^2$ =standard deviation of baseline-post difference in control group,  $SD_{DIFF IG}^2$ = standard deviation of baseline-post difference in intervention group, t=t statistic [34].

## References

34. Thalheimer W, Cook S. How to calculate effect sizes from published research: A simplified methodology. 2002.
