# Supplementary material for: Recommended motor assessments based on psychometric properties in individuals with dementia: a systematic review
Source: Springer Nature journal article supplement (doi:10.1186/s11556-019-0228-z), 2019-11-03
Supplement: MOESM4 [file 17344490]

## Additional file 4

### Formulas for calculating minimal detectable change at 95% confidence interval

$$MDC_{95\%} = \frac{MDC_{95}}{mean} * 100$$

$$MDC_{95\%} = \frac{SEM * 1.96 * \sqrt{2}}{mean} * 100$$

with  $MDC_{95}$ =minimal detectable change at 95% confidence interval,  
mean=mean of all available scores for an assessment, and  
SEM=standard error of measurement [39, 40]

## References

39. Portney LG, Watkins MP. Foundations of clinical research: Applications to practice. 3<sup>rd</sup> ed. Upper Saddle River, N.J.: Pearson/Prentice Hall; 2015.
40. Schwenk M, Gogulla S, Englert S, Czempik A, Hauer K. Test-retest reliability and minimal detectable change of repeated sit-to-stand analysis using one body fixed sensor in geriatric patients. *Physiol Meas*. 2012;33:1931–46. doi:10.1088/0967-3334/33/11/1931.
