# Supplementary material for: Recommended motor assessments based on psychometric properties in individuals with dementia: a systematic review
Source: Springer Nature journal article supplement (doi:10.1186/s11556-019-0228-z), 2019-11-03
Supplement: MOESM5 [file 17344490]

## Additional file 5

### Study characteristics first search

**Table S1.** Study characteristics first search

| Reference                   | Study design | Sample size                                | Setting         | Group | Sample characteristics |                       |                                | Aetiology of dementia | Intervention                                                                                        |
|-----------------------------|--------------|--------------------------------------------|-----------------|-------|------------------------|-----------------------|--------------------------------|-----------------------|-----------------------------------------------------------------------------------------------------|
|                             |              |                                            |                 |       | Gender [% female]      | Age [years] Mean (SD) | MMSE Mean (SD)                 |                       |                                                                                                     |
| Aguilar et al., 2014 [86]   | RCT          | n <sub>r</sub> =40<br>n <sub>a</sub> =34   | n.r.            | CG    | 71%                    | 74.7 (7.4)            | 20.8 (4.0)                     | AD                    | Rivastigmine transdermal patch                                                                      |
|                             |              |                                            |                 | IG    | 77%                    | 78.6 (8.4)            | 20.1 (4.5)                     |                       | Rivastigmine transdermal patch + exercise (aerobic, flexibility, strength, balance; 2x/week, 40min) |
|                             |              |                                            |                 | All   | 74%                    | n.r.                  | n.r., range: n.r.              |                       | 6 months                                                                                            |
| Arcoverde et al., 2014 [56] | RCT          | n <sub>r</sub> =20<br>n <sub>a</sub> =20   | Outpatient unit | CG    | 50%                    | 79.0 (n.r.)           | 19.9 (3.4)                     | AD, MD                | No intervention                                                                                     |
|                             |              |                                            |                 | IG    | 60%                    | 78.5 (n.r.)           | 20.4 (2.7)                     |                       | Treadmill walking (2x/week, 30min)                                                                  |
|                             |              |                                            |                 | All   | n.r.                   | n.r.                  | n.r., CI <sub>95</sub> : 15-25 |                       | 3 months                                                                                            |
| Bossers et al., 2015 [50]   | RCT          | n <sub>r</sub> =123<br>n <sub>a</sub> =109 | Care facility   | CG    | 69%                    | 85.4 (5.0)            | 15.9 (4.2)                     | AD, VD, MD, unknown   | Social visits (4x/week, 30min)                                                                      |
|                             |              |                                            |                 | IG1   | 78%                    | 85.7 (5.1)            | 15.8 (4.3)                     |                       | Strength + walking (4x/week, 30min)                                                                 |
|                             |              |                                            |                 | IG2   | 78%                    | 85.4 (5.4)            | 15.2 (4.8)                     |                       | Walking (4x/week, 30min)                                                                            |
|                             |              |                                            |                 | All   | n.r.                   | 85.5 (5.1)            | n.r., range: 9-23              |                       | 9 weeks                                                                                             |
| Bossers et al., 2016 [112]  | RCT          | n <sub>r</sub> =118<br>n <sub>a</sub> =105 | Care facility   | CG    | 69%                    | 85.7 (4.8)            | 15.9 (4.3)                     | AD, VD, MD, unknown   | Social visits (4x/week, 30min)                                                                      |
|                             |              |                                            |                 | IG1   | 77%                    | 85.7 (5.2)            | 15.9 (4.4)                     |                       | Strength + walking (4x/week, 30min)                                                                 |
|                             |              |                                            |                 | IG2   | 77%                    | 85.5 (5.4)            | 15.3 (4.8)                     |                       | Walking (4x/week, 30min)                                                                            |
|                             |              |                                            |                 | All   | n.r.                   | 85.6 (5.1)            | n.r., range: 9-23              |                       | 9 weeks                                                                                             |

**Table S1.** Study characteristics first search (*Continued*)

| Reference                        | Study design | Sample size                                     | Setting                           | Group | Sample characteristics |                       |                         | Aetiology of dementia | Intervention                                                                                          |
|----------------------------------|--------------|-------------------------------------------------|-----------------------------------|-------|------------------------|-----------------------|-------------------------|-----------------------|-------------------------------------------------------------------------------------------------------|
|                                  |              |                                                 |                                   |       | Gender [% female]      | Age [years] Mean (SD) | MMSE Mean (SD)          |                       |                                                                                                       |
| Burgener et al., 2008 [65]       | RCT          | n <sub>r</sub> =43<br>n <sub>a</sub> =33        | n.r.                              | CG    | 47%                    | 76.0 (8.1)            | 22.9 (5.2)              | AD, VD, MD, LBD, FLD  | Attention-control educational program                                                                 |
|                                  |              |                                                 |                                   | IG    | 46%                    | 77.9 (7.9)            | 24.8 (3.5)              |                       | Taiji exercise (3x/week, 60min), cognitive-behavioural therapy, support group (both bi-weekly, 90min) |
|                                  |              |                                                 |                                   | All   | 47%                    | 77.0 (n.r.)           | n.r., range: n.r.       |                       | 20 weeks                                                                                              |
| Cancela et al., 2016 [82]        | RCT          | n <sub>r</sub> =189<br>n <sub>a</sub> =189/114* | Care facility                     | CG    | 81%                    | 82.9 (7.4)            | n.r.                    | n.r.                  | Non-physical distractive recreational activities                                                      |
|                                  |              |                                                 |                                   | IG    | 44%                    | 80.6 (8.3)            | n.r.                    |                       | Cycling (daily, min. 15min)                                                                           |
|                                  |              |                                                 |                                   | All   | 67%                    | n.r.                  | n.r., range: n.r.       |                       | 15 months                                                                                             |
| Christofolotti et al., 2008 [66] | RCT          | n <sub>r</sub> =54<br>n <sub>a</sub> =41        | Long-term psychiatric institution | CG    | 70%                    | 79.4 (2.0)            | 14.6 (1.2)              | MD                    | No motor intervention                                                                                 |
|                                  |              |                                                 |                                   | IG1   | 65%                    | 70.0 (1.8)            | 18.7 (1.7)              |                       | Physiotherapy, occupational therapy, physical education (5x/week, 120min)                             |
|                                  |              |                                                 |                                   | IG2   | 71%                    | 72.9 (2.3)            | 12.7 (2.1)              |                       | Physiotherapy (3x/week, 60min)                                                                        |
|                                  |              |                                                 |                                   | All   | 69%                    | 74.3 (1.4)            | n.r., range: n.r.       |                       | 6 months                                                                                              |
| Cott et al., 2002 [124]          | RCT          | n <sub>r</sub> =86<br>n <sub>a</sub> =74        | Care facility                     | CG    | 42%                    | 79.8 (8.3)            | 6.31 (7.46)             | AD                    | No intervention                                                                                       |
|                                  |              |                                                 |                                   | IG1   | 53%                    | 83.2 (8.3)            | 6.16 (6.16)             |                       | Conversation while walking (5x/week, 30min)                                                           |
|                                  |              |                                                 |                                   | IG2   | 60%                    | 81.7 (7.4)            | 5.44 (5.98)             |                       | Conversation (5x/week, 30min)                                                                         |
|                                  |              |                                                 |                                   | All   | 53%                    | 82 (8)                | 6 (6), range: 0-21      |                       | 16 weeks                                                                                              |
| Dawson et al., 2019 [74]         | RCT          | n <sub>r</sub> =23<br>n <sub>a</sub> =23        | Community-dwelling                | CG    | 70%                    | 74.0 (10.4)           | 22.0 (3.1)              | n.r.                  | No intervention                                                                                       |
|                                  |              |                                                 |                                   | IG    | 46%                    | 73.8 (8.5)            | 19.9 (6.1)              |                       | Moderate-intensity home-based functional exercise (strength, balance; 2x/week)                        |
|                                  |              |                                                 |                                   | All   | 57%                    | 73.9 (9.1)            | 20.8 (5.0), range: 9-28 |                       | 12 weeks                                                                                              |

**Table S1.** Study characteristics first search (*Continued*)

| Reference                   | Study design | Sample size                                   | Setting                             | Group | Sample characteristics |                       |                         | Aetiology of dementia      | Intervention                                                                                           |
|-----------------------------|--------------|-----------------------------------------------|-------------------------------------|-------|------------------------|-----------------------|-------------------------|----------------------------|--------------------------------------------------------------------------------------------------------|
|                             |              |                                               |                                     |       | Gender [% female]      | Age [years] Mean (SD) | MMSE Mean (SD)          |                            |                                                                                                        |
| Francese et al., 1997 [76]  | RCT          | n <sub>r</sub> =12<br>n <sub>a</sub> =11      | Care facility                       | CG    | n.r.                   | n.r.                  | n.r.                    | AD                         | Watching a music video sing-a-long (3x/week, 20min)                                                    |
|                             |              |                                               |                                     | IG    | n.r.                   | n.r.                  | n.r.                    |                            | Exercise (3x/week, 20min)                                                                              |
|                             |              |                                               |                                     | All   | n.r.                   | n.r.                  | n.r.                    |                            | 7 weeks                                                                                                |
| Hauer et al., 2017 [77]     | RCT          | n <sub>r</sub> =34<br>n <sub>a</sub> =28      | Post-ward geriatric rehabilitation  | CG    | 71%                    | 83.3 (5.7)            | 18.2 (4.4)              | n.r.                       | Usual care                                                                                             |
|                             |              |                                               |                                     | IG    | 65%                    | 81.4 (6.6)            | 19.5 (4.6)              |                            | Postural control and strength home training (at least once per day)                                    |
|                             |              |                                               |                                     | All   | n.r.                   | 81.9 (5.7)            | 18.8 (4.7), range: n.r. |                            | 6 weeks                                                                                                |
| Hauer et al., 2012 [78]     | RCT          | n <sub>r</sub> =122<br>n <sub>a</sub> =107    | Outpatient geriatric rehabilitation | CG    | 73%                    | 82.9 (7.0)            | 21.9 (3.2)              | AD, VD, other              | Motor placebo group training (2x/week, 60min)                                                          |
|                             |              |                                               |                                     | IG    | 74%                    | 82.3 (6.6)            | 21.7 (2.8)              |                            | Progressive resistance and functional training (2x/week, 120min)                                       |
|                             |              |                                               |                                     | All   | n.r.                   | n.r.                  | n.r., range: n.r.       |                            | 3 months                                                                                               |
| Henskens et al., 2018 [113] | RCT          | n <sub>r</sub> =87<br>n <sub>a</sub> =87/ 16* | Care facility                       | CG1   | 77%                    | 84.7 (4.6)            | 10.2 (5.7)              | AD, VD, MD, other/ unknown | Social activity                                                                                        |
|                             |              |                                               |                                     | CG2   | 77%                    | 85.1 (4.6)            | 12.1 (6.4)              |                            | Multicomponent aerobic and strength exercise (3x/week, 30-45min)                                       |
|                             |              |                                               |                                     | IG1   | 91%                    | 86.1 (5.9)            | 13.2 (3.7)              |                            | Activities of daily living training + social activity                                                  |
|                             |              |                                               |                                     | IG2   | 63%                    | 87.0 (7.2)            | 13.6 (5.6)              |                            | Activities of daily living training + multicomponent aerobic and strength exercise (3x/week, 30-45min) |
|                             |              |                                               |                                     | All   | n.r.                   | n.r.                  | n.r., range: n.r.       |                            | 6 months                                                                                               |

**Table S1.** Study characteristics first search (*Continued*)

| Reference                    | Study design | Sample size                              | Setting           | Group | Sample characteristics |                       |                         | Aetiology of dementia | Intervention                                                                                            |
|------------------------------|--------------|------------------------------------------|-------------------|-------|------------------------|-----------------------|-------------------------|-----------------------|---------------------------------------------------------------------------------------------------------|
|                              |              |                                          |                   |       | Gender [% female]      | Age [years] Mean (SD) | MMSE Mean (SD)          |                       |                                                                                                         |
| Kampragkou et al., 2017 [83] | RCT          | n <sub>r</sub> =36<br>n <sub>a</sub> =30 | Hospitalised      | CG    | n.r.                   | n.r.                  | 16.0 (3.0)              | AD                    | Memory games (3x/week, 40min)                                                                           |
|                              |              |                                          |                   | IG    | n.r.                   | n.r.                  | 14.7 (3.1)              |                       | Aerobic exercise (3x/week, 30min), memory games, attention, speech, and music (3x/week, 10min)          |
|                              |              |                                          |                   | All   | n.r.                   | n.r.                  | n.r., range: n.r.       |                       | 12 weeks                                                                                                |
| Kemoun et al., 2010 [96]     | RCT          | n <sub>r</sub> =38<br>n <sub>a</sub> =31 | Care facility     | CG    | 73%                    | 81.7 (5.1)            | 12.9                    | AD                    | No intervention                                                                                         |
|                              |              |                                          |                   | IG    | 75%                    | 82.0 (5.8)            | 12.6                    |                       | Exercise (walking, equilibrium, stamina; 3x/week, 60min)                                                |
|                              |              |                                          |                   | All   | 74%                    | 81.8 (5.3)            | n.r., range: 7-20       |                       | 15 weeks                                                                                                |
| Kim et al., 2016 [67]        | RCT          | n <sub>r</sub> =38<br>n <sub>a</sub> =31 | Care facility     | CG    | 86%                    | 80.9 (6.1)            | 16.6 (4.0)              | AD                    | Multicomponent intervention (5x/week, 2x/day, 60min)                                                    |
|                              |              |                                          |                   | IG    | 68%                    | 81.9 (7.0)            | 13.4 (4.2)              |                       | Lower-limb aerobic exercise (5x/week, 60min) + multicomponent intervention (5x/week, 2x/day, 60min)     |
|                              |              |                                          |                   | All   | 76%                    | 81.5 (6.6)            | 14.8 (4.4), range: n.r. |                       | 6 months                                                                                                |
| Kovács et al., 2013 [79]     | RCT          | n <sub>r</sub> =86<br>n <sub>a</sub> =62 | Care facility     | CG    | 79                     | 79.3 (12.7)           | 20.9 (3.8)              | n.r.                  | Usual care including social activities                                                                  |
|                              |              |                                          |                   | IG    | 83                     | 76.4 (9.4)            | 20.9 (3.2)              |                       | Exercise (strengthening, balance, walking; 2x/week)                                                     |
|                              |              |                                          |                   | All   | 81%                    | n.r.                  | n.r., range: n.r.       |                       | 12 months                                                                                               |
| Lam et al., 2018 [68]        | RCT          | n <sub>r</sub> =54<br>n <sub>a</sub> =54 | Day-care facility | CG    | 78%                    | 79.9 (6.7)            | 15.6 (4.5)              | n.r.                  | Routine program including 30-60min of exercise (2x/week)                                                |
|                              |              |                                          |                   | IG    | 70%                    | 79.7 (5.5)            | 13.6 (4.7)              |                       | Routine program including 30-60min of exercise + whole-body vibration training (4-6min + rest, 2x/week) |
|                              |              |                                          |                   | All   | 74%                    | 79.8 (6.1)            | n.r., range: n.r.       |                       | 9 weeks                                                                                                 |

**Table S1.** Study characteristics first search (*Continued*)

| Reference                    | Study design | Sample size                              | Setting            | Group | Sample characteristics |                       |                         | Aetiology of dementia | Intervention                                                                                   |
|------------------------------|--------------|------------------------------------------|--------------------|-------|------------------------|-----------------------|-------------------------|-----------------------|------------------------------------------------------------------------------------------------|
|                              |              |                                          |                    |       | Gender [% female]      | Age [years] Mean (SD) | MMSE Mean (SD)          |                       |                                                                                                |
| Miu et al., 2008 [57]        | RCT          | n <sub>r</sub> =85<br>n <sub>a</sub> =82 | Community-dwelling | CG    | 63%                    | 78 (6)                | Median=20               | AD, VD, MD, PD        | Conventional medical treatment                                                                 |
|                              |              |                                          |                    | IG    | 43%                    | 75 (7)                | Median=20               |                       | Aerobic exercise (treadmill, bicycle, arm ergometer, flexibility exercises; 2x/week, 45-60min) |
|                              |              |                                          |                    | All   | 54%                    | 76 (6)                | Median=20, range: n.r.  |                       | 12 weeks                                                                                       |
| Netz et al., 2007 [58]       | RCT          | n <sub>r</sub> =29<br>n <sub>a</sub> =24 | Day-care facility  | CG    | n.r.                   | n.r.                  | n.r.                    | n.r.                  | Social activity                                                                                |
|                              |              |                                          |                    | IG    | n.r.                   | n.r.                  | n.r.                    |                       | Group physical activity (2x/week, 45min)                                                       |
|                              |              |                                          |                    | All   | 52%                    | 76.9 (6.7)            | 13.3 (5.8), range: n.r. |                       | 12 weeks                                                                                       |
| Padala et al., 2017 [69]     | RCT          | n <sub>r</sub> =30<br>n <sub>a</sub> =30 | Community-dwelling | CG    | 40%                    | 73.9 (7.1)            | 22.7 (2.3)              | AD                    | Walking (5x/week, 30min)                                                                       |
|                              |              |                                          |                    | IG    | 33%                    | 72.1 (5.3)            | 23.3 (2.2)              |                       | Wii-Fit (5x/week, 30min)                                                                       |
|                              |              |                                          |                    | All   | 37%                    | 73.0 (6.2)            | 22.9 (2.2), range: n.r. |                       | 8 weeks                                                                                        |
| Padala et al., 2012 [70]     | RCT          | n <sub>r</sub> =22<br>n <sub>a</sub> =22 | Care facility      | CG    | 73%                    | 81.6 (5.2)            | 24.9 (3.6)              | AD                    | Walking (5x/week, 30min)                                                                       |
|                              |              |                                          |                    | IG    | 73%                    | 79.3 (9.8)            | 22.6 (4.3)              |                       | Wii-Fit (5x/week, 30min)                                                                       |
|                              |              |                                          |                    | All   | 73%                    | n.r.                  | n.r., range: n.r.       |                       | 8 weeks                                                                                        |
| Pedrinolla et al., 2018 [93] | RCT          | n <sub>r</sub> =53<br>n <sub>a</sub> =34 | Community-dwelling | CG    | 61%                    | 79 (6)                | 21 (5)                  | AD                    | Standard cognitive treatment (3x/week, 90min)                                                  |
|                              |              |                                          |                    | IG    | 63%                    | 80 (7)                | 22 (5)                  |                       | Aerobic and strength training (3x/week, 90min)                                                 |
|                              |              |                                          |                    | All   | 62%                    | n.r.                  | n.r., range: n.r.       |                       | 6 months                                                                                       |

**Table S1.** Study characteristics first search (*Continued*)

| Reference                      | Study design | Sample size                                | Setting            | Group | Sample characteristics |                       |                         | Aetiology of dementia  | Intervention                                                                                      |
|--------------------------------|--------------|--------------------------------------------|--------------------|-------|------------------------|-----------------------|-------------------------|------------------------|---------------------------------------------------------------------------------------------------|
|                                |              |                                            |                    |       | Gender [% female]      | Age [years] Mean (SD) | MMSE Mean (SD)          |                        |                                                                                                   |
| Pitkälä et al., 2013 [109]     | RCT          | n <sub>r</sub> =210<br>n <sub>a</sub> =194 | Community-dwelling | CG    | 37%                    | 78.1 (5.3)            | 17.7 (6.2)              | AD                     | Usual community care                                                                              |
|                                |              |                                            |                    | IG1   | 36%                    | 78.3 (5.1)            | 18.5 (6.3)              |                        | Group-based exercise (2x/week, 60min)                                                             |
|                                |              |                                            |                    | IG2   | 43%                    | 77.7 (5.4)            | 17.8 (6.6)              |                        | Home-based exercise (2x/week, 60min)                                                              |
|                                |              |                                            |                    | All   | 39%                    | n.r.                  | n.r., range: n.r.       |                        | 12 months                                                                                         |
| Pomeroy et al., 1999 [125]     | RCT          | n <sub>r</sub> =81<br>n <sub>a</sub> =78   | Community-dwelling | CG    | 74%                    | 81.8 (8.4)            | n.r.                    | AD, MD, MID, undefined | Non-physical activities                                                                           |
|                                |              |                                            |                    | IG    | 74%                    | 82 (8.0)              | n.r.                    |                        | Physiotherapy (up to 10x 30min)                                                                   |
|                                |              |                                            |                    | All   | 74%                    | 81.9 (n.r.)           | n.r., range: n.r.       |                        | 2 weeks                                                                                           |
| Roach et al., 2011 [105]       | RCT          | n <sub>r</sub> =105<br>n <sub>a</sub> =82  | Care facility      | CG    | n.r.                   | 88.2 (5.8)            | 9.4 (7.2)               | AD                     | Conversation (5x/week, 15-30min)                                                                  |
|                                |              |                                            |                    | IG1   | n.r.                   | 89.2 (6.5)            | 8.7 (7.8)               |                        | Exercise (strength, flexibility, balance, walking; 5x/week, 25-50min)                             |
|                                |              |                                            |                    | IG2   | n.r.                   | 87.3 (6.1)            | 12.2 (7.5)              |                        | Walking (5x/week, 15-30min)                                                                       |
|                                |              |                                            |                    | All   | n.r.                   | 88.2 (6.1)            | 10.2 (7.6), range: n.r. |                        | 16 weeks                                                                                          |
| Rolland et al., 2007 [89]      | RCT          | n <sub>r</sub> =134<br>n <sub>a</sub> =110 | Care facility      | CG    | 79%                    | 83.1 (7.0)            | 7.9 (6.4)               | AD                     | Routine medical care                                                                              |
|                                |              |                                            |                    | IG    | 72%                    | 82.8 (7.8)            | 9.7 (6.8)               |                        | Exercise (walking, strength, balance, flexibility; 2x/week, 60min)                                |
|                                |              |                                            |                    | All   | 75%                    | 83 (7.4)              | 8.8 (6.6), range: n.r.  |                        | 12 months                                                                                         |
| Santana-Sosa et al., 2008 [80] | RCT          | n <sub>r</sub> =16<br>n <sub>a</sub> =16   | Care facility      | CG    | 63%                    | 73 (4)                | 19.9 (1.7)              | AD                     | Routine nursing/medical care                                                                      |
|                                |              |                                            |                    | IG    | 63%                    | 76 (4)                | 20.1 (2.3)              |                        | Training program (resistance, flexibility, joint mobility, balance/ coordination; 3x/week, 75min) |
|                                |              |                                            |                    | All   | 63%                    | n.r.                  | n.r., range: n.r.       |                        | 12 weeks                                                                                          |

**Table S1.** Study characteristics first search (*Continued*)

| Reference                       | Study design | Sample size                                | Setting            | Group | Sample characteristics |                       |                         | Aetiology of dementia | Intervention                                                                                       |
|---------------------------------|--------------|--------------------------------------------|--------------------|-------|------------------------|-----------------------|-------------------------|-----------------------|----------------------------------------------------------------------------------------------------|
|                                 |              |                                            |                    |       | Gender [% female]      | Age [years] Mean (SD) | MMSE Mean (SD)          |                       |                                                                                                    |
| Schwenk et al., 2014 [94]       | Quasi RCT    | n <sub>r</sub> =148<br>n <sub>a</sub> =130 | Geriatric hospital | CG    | 76%                    | 83.9 (6.1)            | 22.2 (2.3)              | n.r.                  | Usual care treatment (occupational therapy, speech therapy, physiotherapy including exercise)      |
|                                 |              |                                            |                    | IG    | 84%                    | 84.2 (6.2)            | 21.4 (2.6)              |                       | Usual care treatment (see above) + intensive exercise (2x daily, up to 60min)                      |
|                                 |              |                                            |                    | All   | n.r.                   | n.r.                  | n.r., range: n.r.       |                       | During rehabilitation period, average: 18.1 (6.8) days                                             |
| Schwenk et al., 2014 [95]       | RCT          | n <sub>r</sub> =61<br>n <sub>a</sub> =49   | Outpatients        | CG    | 63%                    | 82.3 (7.9)            | 21.7 (2.9)              | n.r.                  | Low-intensity motor placebo activity program (60min, 2x/week)                                      |
|                                 |              |                                            |                    | IG    | 65%                    | 80.4 (7.1)            | 21.0 (2.9)              |                       | Progressive resistance and functional group training (120min, 2x/week)                             |
|                                 |              |                                            |                    | All   | 64%                    | 81.9 (7.5)            | 21.4 (2.9), range: n.r. |                       | 3 months                                                                                           |
| Schwenk et al., 2010 [126]      | RCT          | n <sub>r</sub> =61<br>n <sub>a</sub> =49   | n.r.               | CG    | 63%                    | 82.3 (7.9)            | 21.7 (2.9)              | n.r.                  | Unspecific low-intensity exercise (60min, 2x/week)                                                 |
|                                 |              |                                            |                    | IG    | 65%                    | 80.4 (7.1)            | 21.0 (2.9)              |                       | Dual-task-based exercise training (120min, 2x/week)                                                |
|                                 |              |                                            |                    | All   | 64%                    | 81.9 (7.5)            | 21.4 (2.9), range: n.r. |                       | 12 weeks                                                                                           |
| Sobol et al., 2016 [84]         | RCT          | n <sub>r</sub> =200<br>n <sub>a</sub> =189 | Community-dwelling | CG    | 39%                    | 71.3 (7.3)            | 24.1 (3.8)              | AD                    | Usual care                                                                                         |
|                                 |              |                                            |                    | IG    | 48%                    | 69.8 (7.4)            | 23.8 (3.4)              |                       | Moderate-to-high intensity aerobic exercise (3x/week, 60min)                                       |
|                                 |              |                                            |                    | All   | 44%                    | 70.5 (7.4)            | 24.0 (3.6), range: n.r. |                       | 16 weeks                                                                                           |
| Souto Barreto et al., 2017 [90] | Cluster RCT  | n <sub>r</sub> =98<br>n <sub>a</sub> =91   | Care facility      | CG    | 77%                    | 86.9 (5.8)            | 10.8 (5.5)              | AD, VD, MD            | Social activity (2x/week, 60min)                                                                   |
|                                 |              |                                            |                    | IG    | 93%                    | 88.3 (5.1)            | 11.4 (6.2)              |                       | Multicomponent training (range of motion, coordination, balance strength, aerobic; 2x/week, 60min) |
|                                 |              |                                            |                    | All   | 86%                    | n.r.                  | n.r., range: n.r.       |                       | 24 weeks                                                                                           |

**Table S1.** Study characteristics first search (*Continued*)

| Reference                   | Study design | Sample size                                | Setting            | Group | Sample characteristics |                       |                          | Aetiology of dementia | Intervention                                                                       |
|-----------------------------|--------------|--------------------------------------------|--------------------|-------|------------------------|-----------------------|--------------------------|-----------------------|------------------------------------------------------------------------------------|
|                             |              |                                            |                    |       | Gender [% female]      | Age [years] Mean (SD) | MMSE Mean (SD)           |                       |                                                                                    |
| Steinberg et al., 2009 [98] | RCT          | n <sub>r</sub> =27<br>n <sub>a</sub> =27   | Community-dwelling | CG    | 69%                    | 74.0 (8.1)            | 15.5 (5.4)               | AD                    | Home safety assessment                                                             |
|                             |              |                                            |                    | IG    | 71%                    | 76.5 (3.9)            | 20.1 (5.1)               |                       | Home-based exercise (aerobic, strength, balance, flexibility; daily)               |
|                             |              |                                            |                    | All   | 79%                    | n.r.                  | n.r., range: n.r.        |                       | 12 weeks                                                                           |
| Suttanon et al., 2013 [52]  | RCT          | n <sub>r</sub> =40<br>n <sub>a</sub> =40   | Community-dwelling | CG    | 57%                    | 80.5 (6.0)            | 21.7 (4.4)               | AD                    | Home-based education program                                                       |
|                             |              |                                            |                    | IG    | 68%                    | 83.4 (5.1)            | 20.9 (4.7)               |                       | Home-based individually tailored exercise (balance, strength, walking; 5x/week)    |
|                             |              |                                            |                    | All   | 62.5%                  | 81.9 (5.7)            | n.r., range: n.r.        |                       | 6 months                                                                           |
| Tappen et al., 2000 [106]   | RCT          | n <sub>r</sub> =71<br>n <sub>a</sub> =65   | Care facility      | CG    | n.r.                   | 89.6 (6.5)            | 12.5 (5.9)               | AD                    | Conversation (3x/week, 30min)                                                      |
|                             |              |                                            |                    | IG1   | n.r.                   | 84.3 (7.5)            | 10.8 (6.0)               |                       | Walking combined with conversation (3x/week, 30min)                                |
|                             |              |                                            |                    | IG2   | n.r.                   | 87.4 (5.9)            | 9.8 (6.0)                |                       | Walking (3x/week, 30min)                                                           |
|                             |              |                                            |                    | All   | 84%                    | 87 (n.r.)             | 10.8 (n.r.), range: 0-23 |                       | 16 weeks                                                                           |
| Telenius et al., 2015 [71]  | RCT          | n <sub>r</sub> =170<br>n <sub>a</sub> =160 | Care facility      | CG    | 75%                    | 86.4 (7.8)            | 15.8 (5.0)               | n.r.                  | Leisure activities (2x/week, 50-60min)                                             |
|                             |              |                                            |                    | IG    | 72%                    | 86.9 (7)              | 15.6 (5.0)               |                       | Intensive strengthening and balance exercises (2x/week, 50-60min)                  |
|                             |              |                                            |                    | All   | 74%                    | 86.7 (7.4)            | 15.7 (5.0), range: n.r.  |                       | 12 weeks                                                                           |
| Toots et al., 2017 [91]     | Cluster RCT  | n <sub>r</sub> =186<br>n <sub>a</sub> =153 | Care facility      | CG    | 76%                    | 85.9 (7.8)            | 14.4 (3.5)               | AD, VD, MD, other     | Seated attention control activity                                                  |
|                             |              |                                            |                    | IG    | 75%                    | 84.4 (6.2)            | 15.4 (3.4)               |                       | High-intensity functional exercise (strength, balance, mobility; 2-3x/week, 45min) |
|                             |              |                                            |                    | All   | 76%                    | 85.1 (7.1)            | 14.9 (3.5), range: n.r.  |                       | 4 months                                                                           |



**Table S1.** Study characteristics first search (*Continued*)

| Reference                     | Study design | Sample size                                | Setting                                               | Group | Sample characteristics |                       |                          | Aetiology of dementia   | Intervention                                                                            |
|-------------------------------|--------------|--------------------------------------------|-------------------------------------------------------|-------|------------------------|-----------------------|--------------------------|-------------------------|-----------------------------------------------------------------------------------------|
|                               |              |                                            |                                                       |       | Gender [% female]      | Age [years] Mean (SD) | MMSE Mean (SD)           |                         |                                                                                         |
| Toots et al., 2016 [72]       | Cluster RCT  | n <sub>r</sub> =186<br>n <sub>a</sub> =167 | Care facility                                         | CG    | 76%                    | 85.9 (7.8)            | 14.4 (3.5)               | AD, VD, MD, other       | Seated attention control activity                                                       |
|                               |              |                                            |                                                       | IG    | 75%                    | 84.4 (6.2)            | 15.4 (3.4)               |                         | High-intensity functional exercise (strength, balance, mobility; 2-3x/week, 45min)      |
|                               |              |                                            |                                                       | All   | 76%                    | 85.1 (7.1)            | 14.9 (3.5), range: n.r.  |                         | 4 months                                                                                |
| Toulotte et al., 2003 [85]    | RCT          | n <sub>r</sub> =20<br>n <sub>a</sub> =20   | n.r.                                                  | CG    | n.r.                   | 81.9 (4.1)            | 18.0 (5.4)               | AD, PD, stroke, unknown | Daily routine                                                                           |
|                               |              |                                            |                                                       | IG    | n.r.                   | 81.0 (5.6)            | 14.7 (7.6)               |                         | Physical training (2x/week, 45min)                                                      |
|                               |              |                                            |                                                       | All   | n.r.                   | 81.4 (4.7)            | 16.3 (6.5), range: n.r.  |                         | 16 weeks                                                                                |
| Venturelli et al., 2011 [107] | RCT          | n <sub>r</sub> =24<br>n <sub>a</sub> =21   | Care facility                                         | CG    | n.r.                   | 85 (5)                | 12 (2)                   | AD                      | Routine care                                                                            |
|                               |              |                                            |                                                       | IG    | n.r.                   | 83 (6)                | 13 (2)                   |                         | Walking program (4x/week, 30min)                                                        |
|                               |              |                                            |                                                       | All   | n.r.                   | 84 (5)                | n.r., range: n.r.        |                         | 24 weeks                                                                                |
| Vreugdenhil et al., 2012 [59] | RCT          | n <sub>r</sub> =40<br>n <sub>a</sub> =40   | Community-dwelling                                    | CG    | 75%                    | 74.7 (n.r.)           | 21.0 (6.3)               | AD                      | Usual treatment                                                                         |
|                               |              |                                            |                                                       | IG    | 45%                    | 73.5 (n.r.)           | 22.9 (5.0)               |                         | Community-based home exercise program (daily)                                           |
|                               |              |                                            |                                                       | All   | 60%                    | 74.1 (n.r.)           | 22.0 (n.r.), range 10-28 |                         | 4 months                                                                                |
| Werner et al., 2017 [100]     | RCT          | n <sub>r</sub> =97<br>n <sub>a</sub> =80   | Geriatric hospital, care facility, community dwelling | CG    | 78%                    | 82.5 (5.7)            | 21.5 (3.0)               | n.r.                    | Low-intensity motor placebo activity (2x/week, 60min)                                   |
|                               |              |                                            |                                                       | IG    | 71%                    | 82.6 (6.1)            | 22.2 (2.9)               |                         | Motor learning exercise program on compensatory sit-to-stand maneuvers (2x/week, 90min) |
|                               |              |                                            |                                                       | All   | 74%                    | 82.5 (5.9)            | 21.9 (2.9), range: n.r.  |                         | 10weeks                                                                                 |
| Wesson et al., 2013 [61]      | RCT          | n <sub>r</sub> =22<br>n <sub>a</sub> =21   | Community-dwelling                                    | CG    | 36%                    | 80.9 (5.0)            | 22.5 (4.3)               | n.r.                    | Usual care                                                                              |
|                               |              |                                            |                                                       | IG    | 46%                    | 78.7 (4.2)            | 24.5 (3.1)               |                         | Strength and balance training exercises and home hazard reduction                       |
|                               |              |                                            |                                                       | All   | 41%                    | n.r.                  | n.r., range: 15-29       |                         | 12 weeks                                                                                |

**Table S1.** Study characteristics first search (*Continued*)

| Reference                | Study design | Sample size                              | Setting                                               | Group | Sample characteristics |                       |                         | Aetiology of dementia | Intervention                                                                                                                                                   |
|--------------------------|--------------|------------------------------------------|-------------------------------------------------------|-------|------------------------|-----------------------|-------------------------|-----------------------|----------------------------------------------------------------------------------------------------------------------------------------------------------------|
|                          |              |                                          |                                                       |       | Gender [% female]      | Age [years] Mean (SD) | MMSE Mean (SD)          |                       |                                                                                                                                                                |
| Wiloth et al., 2018 [54] | RCT          | n <sub>r</sub> =99<br>n <sub>a</sub> =84 | Geriatric hospital, care facility, community dwelling | CG    | 74%                    | 82.2 (5.3)            | 21.7 (2.9)              | n.r.                  | Supervised motor placebo group training (2x/week, 60min)                                                                                                       |
|                          |              |                                          |                                                       | IG    | 70%                    | 82.7 (6.2)            | 22.2 (2.8)              |                       | Comprehensive motor-cognitive intervention program (game-based training using Physiomat, dual-task training, motor learning exercise program) (2x/week, 90min) |
|                          |              |                                          |                                                       | All   | 72%                    | 82.9 (5.8)            | 22.0 (2.9), range: n.r. |                       | 10 weeks                                                                                                                                                       |
| Yoon et al., 2013 [73]   | RCT          | n <sub>r</sub> =30<br>n <sub>a</sub> =20 | Care facility                                         | CG    | n.r.                   | 70.1 (12.2)           | 18.7 (1.2)              | n.r.                  | Conventional physical therapy (5x/week, 30min) + cognitive activity (3x/week, 20min)                                                                           |
|                          |              |                                          |                                                       | IG    | n.r.                   | 77.9 (7.5)            | 18.0 (1.5)              |                       | Conventional physical therapy (5x/week, 30min) + cognitive activity combined with cycling (3x/week, 20min)                                                     |
|                          |              |                                          |                                                       | All   | n.r.                   | n.r.                  | n.r., range: 16-23      |                       | 12 weeks                                                                                                                                                       |

AD: Alzheimer's disease, CG: control group, CI<sub>95</sub>: 95% confidence interval, FLD: Frontal lobe dementia, IG: intervention group, LBD: Lewy body disease, MD: mixed dementia (AD+VD), MID: multi-infarct dementia, MMSE: Mini-Mental State Examination, n<sub>a</sub>: number of analysed participants, n<sub>r</sub>: number of randomised participants, n.r.: not reported, PD: Parkinson's disease dementia, RCT: randomised controlled trial, SD: standard deviation, VD: vascular dementia

\* Intention-to-treat analysis and complete-case analysis

## References

50. Bossers WJR, van der Woude LHV, Boersma F, Hortobágyi T, Scherder EJA, van Heuvelen MJG. A 9-Week Aerobic and Strength Training Program Improves Cognitive and Motor Function in Patients with Dementia: A Randomized, Controlled Trial. *Am J Geriatr Psychiatry*. 2015;23:1106–16. doi:10.1016/j.jagp.2014.12.191.
52. Suttanon P, Hill KD, Said CM, Williams SB, Byrne KN, LoGiudice D, et al. Feasibility, safety and preliminary evidence of the effectiveness of a home-based exercise programme for older people with Alzheimer's disease: A pilot randomized controlled trial. *Clin Rehabil*. 2013;27:427–38. doi:10.1177/0269215512460877.
54. Wiloth S, Werner C, Lemke NC, Bauer J, Hauer K. Motor-cognitive effects of a computerized game-based training method in people with dementia: A randomized controlled trial. *Aging Ment Health*. 2018;22:1124–35. doi:10.1080/13607863.2017.1348472.
56. Arcoverde C, Deslandes A, Moraes H, Almeida C, Araujo NBd, Vasques PE, et al. Treadmill training as an augmentation treatment for Alzheimer's disease: A pilot randomized controlled study. *Arq Neuropsiquiatr*. 2014;72:190–6. doi:10.1590/0004-282X20130231.
57. Miu D, Szeto S, Mak Y. A randomized controlled trial on the effect of exercise on physical, cognitive, and affective function in dementia subjects. *Asian J Gerontol Geriatr*. 2008;3:8–16.
58. Netz Y, Axelrad S, Argov E. Group physical activity for demented older adults feasibility and effectiveness. *Clin Rehabil*. 2007;21:977–86. doi:10.1177/0269215507078318.
59. Vreugdenhil A, Cannell J, Davies A, Razay G. A community-based exercise programme to improve functional ability in people with Alzheimer's disease: A randomized controlled trial. *Scand J Caring Sci*. 2012;26:12–9. doi:10.1111/j.1471-6712.2011.00895.x.
61. Wesson J, Clemson L, Brodaty H, Lord S, Taylor M, Gitlin L, Close J. A feasibility study and pilot randomised trial of a tailored prevention program to reduce falls in older people with mild dementia. *BMC Geriatr*. 2013;13:89. doi:10.1186/1471-2318-13-89.
65. Burgener SC, Yang Y, Gilbert R, Marsh-Yant S. The effects of a multimodal intervention on outcomes of persons with early-stage dementia. *Am. J. Alzheimers Dis. Other Dement*. 2008;23:382–94. doi:10.1177/1533317508317527.
66. Christofoletti G, Oliani MM, Gobbi S, Stella F, Bucken Gobbi LT, Renato Canineu P. A controlled clinical trial on the effects of motor intervention on balance and cognition in institutionalized elderly patients with dementia. *Clin Rehabil*. 2008;22:618–26. doi:10.1177/0269215507086239.
67. Kim M-J, Han C-W, Min K-Y, Cho C-Y, Lee C-W, Ogawa Y, et al. Physical Exercise with Multicomponent Cognitive Intervention for Older Adults with Alzheimer's Disease: A 6-Month Randomized Controlled Trial. *Dement Geriatr Cogn Dis Extra*. 2016;6:222–32. doi:10.1159/000446508.
68. Lam FMH, Liao LR, Kwok TCY, Pang MYC. Effects of adding whole-body vibration to routine day activity program on physical functioning in elderly with mild or moderate dementia: A randomized controlled trial. *Int J Geriatr Psychiatry*. 2018;33:21–30. doi:10.1002/gps.4662.
69. Padala KP, Padala PR, Lensing SY, Dennis RA, Bopp MM, Roberson PK, Sullivan DH. Home-Based Exercise Program Improves Balance and Fear of Falling in Community-Dwelling Older Adults with Mild Alzheimer's Disease: A Pilot Study. *J Alzheimers Dis*. 2017;59:565–74. doi:10.3233/JAD-170120.
70. Padala KP, Padala PR, Malloy TR, Geske JA, Dubbert PM, Dennis RA, et al. Wii-fit for improving gait and balance in an assisted living facility: A pilot study. *J Aging Res*. 2012;2012:597573. doi:10.1155/2012/597573.
71. Telenius EW, Engedal K, Bergland A. Effect of a high-intensity exercise program on physical function and mental health in nursing home residents with dementia: An assessor blinded randomized controlled trial. *PLoS One*. 2015;10:e0126102. doi:10.1371/journal.pone.0126102.
72. Toots A, Littbrand H, Lindelöf N, Wiklund R, Holmberg H, Nordström P, et al. Effects of a High-Intensity Functional Exercise Program on Dependence in Activities of Daily Living and Balance in Older Adults with Dementia. *J Am Geriatr Soc*. 2016;64:55–64. doi:10.1111/jgs.13880.

73. Yoon JE, Lee SM, Lim HS, Kim TH, Jeon JK, Mun MH. The effects of cognitive activity combined with active extremity exercise on balance, walking activity, memory level and quality of life of an older adult sample with dementia. *J. Phys. Ther. Sci.* 2013;25:1601–4. doi:10.1589/jpts.25.1601.
74. Dawson N, Judge KS, Gerhart H. Improved Functional Performance in Individuals With Dementia After a Moderate-Intensity Home-Based Exercise Program: A Randomized Controlled Trial. *J Geriatr Phys Ther.* 2019;42:18–27. doi:10.1519/JPT.000000000000128.
76. Francese T, Sorrell J, Butler FR. The effects of regular exercise on muscle strength and functional abilities of late stage Alzheimer's residents. *Am J Alzheimers Dis Other Demen.* 1997;12:122–7. doi:10.1177/153331759701200305.
77. Hauer K, Ullrich P, Dutzi I, Beurskens R, Kern S, Bauer J, Schwenk M. Effects of Standardized Home Training in Patients with Cognitive Impairment following Geriatric Rehabilitation: A Randomized Controlled Pilot Study. *Gerontology.* 2017;63:495–506. doi:10.1159/000478263.
78. Hauer K, Schwenk M, Zieschang T, Essig M, Becker C, Oster P. Physical training improves motor performance in people with dementia: A randomized controlled trial. *J Am Geriatr Soc.* 2012;60:8–15. doi:10.1111/j.1532-5415.2011.03778.x.
79. Kovács E, Sztruhár Jónásné I, Karóczy CK, Korpos A, Gondos T. Effects of a multimodal exercise program on balance, functional mobility and fall risk in older adults with cognitive impairment: A randomized controlled single-blind study. *Eur J Phys Rehabil Med.* 2013;49:639–48.
80. Santana-Sosa E, Barriopedro MI, López-Mojares LM, Pérez M, Lucia A. Exercise training is beneficial for Alzheimer's patients. *Int J Sports Med.* 2008;29:845–50. doi:10.1055/s-2008-1038432.
82. Cancela JM, Ayán C, Varela S, Seijo M. Effects of a long-term aerobic exercise intervention on institutionalized patients with dementia. *J Sci Med Sport.* 2016;19:293–8. doi:10.1016/j.jsams.2015.05.007.
83. Kampragkou C, Iakovidis P, Kampragkou E, Kellis E. Effects of a 12-Week Aerobic Exercise Program Combined with Music Therapy and Memory Exercises on Cognitive and Functional Ability in People with Middle Type of Alzheimer's Disease. *International Journal of Physiotherapy* 2017. doi:10.15621/ijphy/2017/v4i5/159420.
84. Sobol NA, Hoffmann K, Frederiksen KS, Vogel A, Vestergaard K, Brændgaard H, et al. Effect of aerobic exercise on physical performance in patients with Alzheimer's disease. *Alzheimers Dement.* 2016;12:1207–15. doi:10.1016/j.jalz.2016.05.004.
85. Toulotte C, Fabre C, Dangremont B, Lensele G, Thévenon A. Effects of physical training on the physical capacity of frail, demented patients with a history of falling: A randomised controlled trial. *Age Ageing.* 2003;32:67–73. doi:10.1093/ageing/32.1.67.
86. Aguiar P, Monteiro L, Feres A, Gomes I, Melo A. Rivastigmine transdermal patch and physical exercises for Alzheimer's disease: A randomized clinical trial. *Curr Alzheimer Res.* 2014;11:532–7. doi:10.2174/1567205011666140618102224.
89. Rolland Y, Pillard F, Klapouszczak A, Reynish E, Thomas D, Andrieu S, et al. Exercise program for nursing home residents with Alzheimer's disease: A 1-year randomized, controlled trial. *J Am Geriatr Soc.* 2007;55:158–65. doi:10.1111/j.1532-5415.2007.01035.x.
90. Souto Barreto P de, Cesari M, Denormandie P, Armaingaud D, Vellas B, Rolland Y. Exercise or Social Intervention for Nursing Home Residents with Dementia: A Pilot Randomized, Controlled Trial. *J Am Geriatr Soc.* 2017;65:E123-E129. doi:10.1111/jgs.14947.
91. Toots A, Littbrand H, Holmberg H, Nordström P, Lundin-Olsson L, Gustafson Y, Rosendahl E. Walking Aids Moderate Exercise Effects on Gait Speed in People With Dementia: A Randomized Controlled Trial. *J Am Med Dir Assoc.* 2017;18:227–33. doi:10.1016/j.jamda.2016.09.003.
93. Pedrinolla A, Venturelli M, Fonte C, Munari D, Benetti MV, Rudi D, et al. Exercise Training on Locomotion in Patients with Alzheimer's Disease: A Feasibility Study. *J Alzheimers Dis.* 2018;61:1599–609. doi:10.3233/JAD-170625.
94. Schwenk M, Dutzi I, Englert S, Micol W, Najafi B, Mohler J, Hauer K. An intensive exercise program improves motor performances in patients with dementia: Translational model of geriatric rehabilitation. *J Alzheimers Dis.* 2014;39:487–98. doi:10.3233/JAD-130470.

95. Schwenk M, Zieschang T, Englert S, Grewal G, Najafi B, Hauer K. Improvements in gait characteristics after intensive resistance and functional training in people with dementia: A randomised controlled trial. *BMC Geriatr*. 2014;14:73. doi:10.1186/1471-2318-14-73.
96. Kemoun G, Thibaud M, Roumagne N, Carette P, Albinet C, Toussaint L, et al. Effects of a physical training programme on cognitive function and walking efficiency in elderly persons with dementia. *Dement Geriatr Cogn Disord*. 2010;29:109–14. doi:10.1159/000272435.
98. Steinberg M, Leoutsakos J-MS, Podewils LJ, Lyketsos CG. Evaluation of a home-based exercise program in the treatment of Alzheimer's disease: The Maximizing Independence in Dementia (MIND) study. *Int J Geriatr Psychiatry*. 2009;24:680–5. doi:10.1002/gps.2175.
100. Werner C, Wiloth S, Lemke NC, Kronbach F, Jansen C-P, Oster P, et al. People with Dementia Can Learn Compensatory Movement Maneuvers for the Sit-to-Stand Task: A Randomized Controlled Trial. *J Alzheimers Dis*. 2017;60:107–20. doi:10.3233/JAD-170258.
105. Roach KE, Tappen RM, Kirk-Sanchez N, Williams CL, Loewenstein D. A randomized controlled trial of an activity specific exercise program for individuals with Alzheimer disease in long-term care settings. *J Geriatr Phys Ther*. 2011;34:50–6. doi:10.1519/JPT.0b013e31820aab9c.
106. Tappen RM, Roach KE, Applegate EB, Stowell P. Effect of a combined walking and conversation intervention on functional mobility of nursing home residents with Alzheimer disease. *Alzheimer Dis Assoc Disord*. 2000;14:196–201. doi:10.1097/00002093-200010000-00002.
107. Venturelli M, Scarsini R, Schena F. Six-month walking program changes cognitive and ADL performance in patients with Alzheimer. *Am J Alzheimers Dis Other Demen*. 2011;26:381–8. doi:10.1177/1533317511418956.
109. Pitkälä KH, Pöysti MM, Laakkonen M-L, Tilvis RS, Savikko N, Kautiainen H, Strandberg TE. Effects of the Finnish Alzheimer disease exercise trial (FINALEX): A randomized controlled trial. *JAMA Intern Med*. 2013;173:894–901. doi:10.1001/jamainternmed.2013.359.
112. Bossers WJR, van der Woude LHV, Boersma F, Hortobágyi T, Scherder EJA, van Heuvelen MJG. Comparison of Effect of Two Exercise Programs on Activities of Daily Living in Individuals with Dementia: A 9-Week Randomized, Controlled Trial. *J Am Geriatr Soc*. 2016;64:1258–66. doi:10.1111/jgs.14160.
113. Henskens M, Nauta IM, Drost KT, Scherder EJ. The effects of movement stimulation on activities of daily living performance and quality of life in nursing home residents with dementia: A randomized controlled trial. *Clin Interv Aging*. 2018;13:805–17. doi:10.2147/CIA.S160031.
124. Cott CA, Dawson P, Sidani S, Wells D. The effects of a walking/talking program on communication, ambulation, and functional status in residents with Alzheimer disease. *Alzheimer Dis Assoc Disord*. 2002;16:81–7. doi:10.1097/00002093-200204000-00005.
125. Pomeroy VM, Warren CM, Honeycombe C, Briggs RS, Wilkinson DG, Pickering RM, Steiner A. Mobility and dementia: Is physiotherapy treatment during respite care effective? *Int J Geriatr Psychiatry*. 1999;14:389–97. doi:10.1002/(SICI)1099-1166(199905)14:5<389::AID-GPS933>3.0.CO;2-8.
126. Schwenk M, Zieschang T, Oster P, Hauer K. Dual-task performances can be improved in patients with dementia: A randomized controlled trial. *Neurology*. 2010;74:1961–8. doi:10.1212/WNL.0b013e3181e39696.
