# Supplementary material for: Recommended motor assessments based on psychometric properties in individuals with dementia: a systematic review
Source: Springer Nature journal article supplement (doi:10.1186/s11556-019-0228-z), 2019-11-03
Supplement: MOESM6 [file 17344490]

## Additional file 6

### Study characteristics main search

**Table S2.** Study characteristics main search

| Reference                     | Sample size | Setting               | Sample characteristics |                          |                                                                       |                       | Cueing                             | Psychometric property<br>(time interval if applicable) | Methodology                                                                                                                             | COSMIN risk of bias  |                      |
|-------------------------------|-------------|-----------------------|------------------------|--------------------------|-----------------------------------------------------------------------|-----------------------|------------------------------------|--------------------------------------------------------|-----------------------------------------------------------------------------------------------------------------------------------------|----------------------|----------------------|
|                               |             |                       | Gender [% female]      | Age [years]<br>Mean (SD) | MMSE<br>Mean (SD),<br>range                                           | Aetiology of dementia |                                    |                                                        |                                                                                                                                         | Relative reliability | Absolute reliability |
| Alencar et al., 2012 [120]    | n=76        | Non-institutionalised | 84%                    | 83.9 (5.8)               | 12.7 (7.2), n.r.<br>SG0: n.r.<br>SG1: n.r.<br>SG2: n.r.<br>SG3: n.r.  | AD, VD                | (a) n.r.                           | Between-day TRR (1 week)                               | ICC (n.r.)                                                                                                                              | Adequate             | N/A                  |
| Blankevoort et al., 2013 [17] | n=58        | (Day-)care facilities | 71%                    | 82.5 (5.3)               | 19.2 (4.4), 10-28<br>SG1: 22.8 (2.1), 20-28<br>SG2: 15.5 (2.6), 10-19 | n.r.                  | (d) verbal & visual/tactile cueing | Between-day TRR (1 week)                               | ICC (2-way, random, absolute agreement on single measures model) with CI <sub>95</sub><br>SEM with CI <sub>95</sub> , MDC <sub>95</sub> | Adequate             | Adequate             |
| Bossers et al., 2014 [63]     | n=42        | Care facilities       | 79%                    | 86.7 (5.2)               | 17.1 (4.3), 9-24<br>SG1: n.r., 20-24<br>SG2: n.r., 9-19               | AD, VD, MD, LBD       | (b) no cueing                      | Between-day TRR (1 week)                               | ICC (2-way mixed single measure, absolute agreement model) with CI <sub>95</sub><br>SEM with CI <sub>95</sub> , MDC <sub>95</sub>       | Adequate             | Adequate             |

**Table S2.** Study characteristics main search (Continued)

| Reference                   | Sample size | Setting            | Sample characteristics |                       |                       |                       | Cueing                                                                 | Psychometric property (time interval if applicable) | Methodology                                                   | COSMIN risk of bias  |                      |
|-----------------------------|-------------|--------------------|------------------------|-----------------------|-----------------------|-----------------------|------------------------------------------------------------------------|-----------------------------------------------------|---------------------------------------------------------------|----------------------|----------------------|
|                             |             |                    | Gender [% female]      | Age [years] Mean (SD) | MMSE Mean (SD), range | Aetiology of dementia |                                                                        |                                                     |                                                               | Relative reliability | Absolute reliability |
| Bronas et al., 2017 [115]   | n=44        | Community-dwelling | 45%                    | 78.4 (6.8)            | 21.6 (3.3), n.r.      | AD                    | (a) n.r./ (c) verbal cueing                                            | Simple associations                                 | Pearson bivariate correlation                                 | N/A                  | N/A                  |
| Graessel et al., 2009 [110] | n=46        | Care facility      | 91%                    | 85.9 (6.6)            | 16.0 (6.1), 1-28      | n.r.                  | (b) no cueing                                                          | Construct validity                                  | Spearman's rank correlation coefficient                       | N/A                  | N/A                  |
|                             |             |                    |                        |                       |                       |                       |                                                                        | Internal consistency                                | Cronbach's $\alpha$ , Spearman's rank correlation coefficient | N/A                  | N/A                  |
|                             |             |                    |                        |                       |                       |                       |                                                                        | Between-day TRR (2 weeks)                           | Spearman's rank correlation coefficient                       | Doubtful             | N/A                  |
| Lee et al., 2017 [43]       | n=53        | Care facility      | n.r.                   | 83.8 (9.9)            | 13.8 (5.7), n.r.      | n.r.                  | (e) more extensive cueing than (c) & (d) including physical assistance | IRR (3 raters)                                      | ICC (2,3)<br>SEM, MDC <sub>95</sub> ,<br>MDC%                 | Adequate             | Very good            |
|                             |             |                    |                        |                       |                       |                       |                                                                        | Between-day TRR (3-7 days)                          |                                                               | Adequate             | Adequate             |

**Table S2.** Study characteristics main search (Continued)

| Reference                       | Sample size | Setting                          | Sample characteristics |                       |                       |                       | Cueing                                                                 | Psychometric property (time interval if applicable) | Methodology                                                | COSMIN risk of bias  |                      |
|---------------------------------|-------------|----------------------------------|------------------------|-----------------------|-----------------------|-----------------------|------------------------------------------------------------------------|-----------------------------------------------------|------------------------------------------------------------|----------------------|----------------------|
|                                 |             |                                  | Gender [% female]      | Age [years] Mean (SD) | MMSE Mean (SD), range | Aetiology of dementia |                                                                        |                                                     |                                                            | Relative reliability | Absolute reliability |
| Luttenberger et al., 2012 [111] | n=139       | Care facility                    | 83%                    | 84.7 (4.9)            | 15.2 (5.3), n.r.      | n.r.                  | (b) no cueing                                                          | Construct validity                                  | Spearman correlation coefficient                           | N/A                  | N/A                  |
|                                 |             |                                  |                        |                       |                       |                       |                                                                        | Criterion-related validity                          | Correlations<br>Kruskal-Wallis test<br>Mann-Whitney U-test | N/A                  | N/A                  |
|                                 |             |                                  |                        |                       |                       |                       |                                                                        | Internal consistency                                | Cronbach's alpha, Spearman correlation coefficient         | N/A                  | N/A                  |
| McGough et al., 2013 [26]       | n=31 (8)*   | Care facility                    | 94%                    | 83.6 (7.0)            | 12.4 (7.0), 2-26      | n.r.                  | (c) verbal cueing                                                      | Concurrent validity                                 | Bivariate and partial correlations                         | N/A                  | N/A                  |
|                                 |             |                                  |                        |                       |                       |                       |                                                                        | Within-day TRR (4h)                                 | ICC (2-way, random)                                        | Adequate             | N/A                  |
| Muir-Hunter et al., 2015 [14]   | n=15        | Community-dwelling (day program) | 27%                    | 80.2 (5.0)            | 20.0 (5.5), n.r.      | AD                    | (e) more extensive cueing than (c) & (d) including physical assistance | IRR                                                 | ICC (n.r.) with CI <sub>95</sub>                           | Adequate             | Very good            |
|                                 |             |                                  |                        |                       |                       |                       |                                                                        | Between-day TRR (1 week)                            | SEM, MDC <sub>95</sub>                                     | Adequate             | Adequate             |

**Table S2.** Study characteristics main search (Continued)

| Reference                  | Sample size | Setting             | Sample characteristics |                       |                                                                       |                       | Cueing                                                                 | Psychometric property (time interval if applicable) | Methodology                                                                                                | COSMIN risk of bias  |                      |
|----------------------------|-------------|---------------------|------------------------|-----------------------|-----------------------------------------------------------------------|-----------------------|------------------------------------------------------------------------|-----------------------------------------------------|------------------------------------------------------------------------------------------------------------|----------------------|----------------------|
|                            |             |                     | Gender [% female]      | Age [years] Mean (SD) | MMSE Mean (SD), range                                                 | Aetiology of dementia |                                                                        |                                                     |                                                                                                            | Relative reliability | Absolute reliability |
| Ries et al., 2009 [6]      | n=51        | (Day-)care facility | 67%                    | 80.7 (8.8)            | 13.1 (8.2), n.r.<br>SG1/2: 17.4 (4.5), 10-26<br>SG3: 10.2 (8.8), n.r. | AD                    | (e) more extensive cueing than (c) & (d) including physical assistance | Within-day TRR (30-60 min)                          | ICC (2,2)/ICC (2,1)<br>SEM, MDC <sub>90</sub>                                                              | Adequate             | Adequate             |
| Schwenk et al., 2014 [117] | n=77        | Geriatric hospital  | 70%                    | 81.8 (6.3)            | 22.1 (3.2), n.r.                                                      | n.r.                  | (a) n.r.                                                               | Criterion validity                                  | Mann-Whitney U-test<br>Logistic regression analysis                                                        | N/A                  | N/A                  |
| Suttanon et al., 2011 [51] | n=14        | Community dwelling  | 50%                    | 79.6 (6.2)            | 21.4 (5.0), n.r.                                                      | AD                    | (d) verbal & visual/tactile cueing                                     | Between-day TRR (1 week)                            | ICC (3,1)<br>SEM, MDC <sub>95</sub> , CV                                                                   | Adequate             | Adequate             |
| Suzuki et al., 2009 [114]  | n=60        | Care facility       | 77%                    | 86.6 (6.2)            | n.r., 0-23<br>SG1/2: n.r., 11-23<br>SG3: n.r., 0-10                   | AD                    | (a) n.r.                                                               | Known group validity                                | Mann-Whitney U-test/unpaired t-test                                                                        | N/A                  | N/A                  |
|                            |             |                     |                        |                       |                                                                       |                       |                                                                        | Predictive validity                                 | Logistic regression analysis                                                                               | N/A                  | N/A                  |
|                            |             |                     |                        |                       |                                                                       |                       |                                                                        | Within-session TRR (3min)                           | ICC (n.r.)                                                                                                 | Adequate             | N/A                  |
| Suzuki et al., 2012 [116]  | n=54        | Care facility       | 76%                    | 87.0 (5.7)            | n.r., 0-24                                                            | AD, MD                | (a) n.r.                                                               | Predictive validity                                 | Chi <sup>2</sup> test/Mann-Whitney U-test/unpaired t-test<br>Forward stepwise logistic regression analysis | N/A                  | N/A                  |

**Table S2.** Study characteristics main search (Continued)

| Reference                  | Sample size | Setting           | Sample characteristics |                       |                       |                       | Cueing                                                                 | Psychometric property (time interval if applicable) | Methodology                                                         | COSMIN risk of bias  |                      |
|----------------------------|-------------|-------------------|------------------------|-----------------------|-----------------------|-----------------------|------------------------------------------------------------------------|-----------------------------------------------------|---------------------------------------------------------------------|----------------------|----------------------|
|                            |             |                   | Gender [% female]      | Age [years] Mean (SD) | MMSE Mean (SD), range | Aetiology of dementia |                                                                        |                                                     |                                                                     | Relative reliability | Absolute reliability |
| Tappen et al., 1997 [118]  | n=33        | Care facility     | 64%                    | 84.7 (3.9)            | 9.3 (6.0), 0-24       | AD                    | (e) more extensive cueing than (c) & (d) including physical assistance | IRR                                                 | ICC (2,1)                                                           | Adequate             | N/A                  |
|                            |             |                   |                        |                       |                       |                       |                                                                        | Between-day and within-day TRR (1 week, AM/ PM)     | ICC (3,1)                                                           | Adequate             | N/A                  |
| Telenius et al., 2015 [15] | n=33        | Care facility     | 76%                    | 82.7 (7.2)            | 15.8 (5.4), n.r.      | n.r.                  | (e) more extensive cueing than (c) & (d) including physical assistance | Internal consistency                                | Cronbach's $\alpha$ , item-to-total correlation                     | N/A                  | N/A                  |
|                            |             |                   |                        |                       |                       |                       |                                                                        | IRR                                                 | Weighted $\kappa$<br>ICC model 2.1<br>SEM, MDC <sub>95</sub> , MDC% | Adequate             | Very good            |
| Thomas et al., 2002 [102]  | n=12        | Day-care facility | 100%                   | 80.5 (6.2)            | 16.9 (7.3), n.r.      | Various               | (d) verbal & visual/tactile cueing                                     | Between-day TRR (7 days)                            | ICC (n.r.)                                                          | Adequate             | N/A                  |

**Table S2.** Study characteristics main search (Continued)

| Reference                  | Sample size | Setting                                               | Sample characteristics |                       |                       |                       | Cueing        | Psychometric property (time interval if applicable)               | Methodology                                                                | COSMIN risk of bias  |                      |
|----------------------------|-------------|-------------------------------------------------------|------------------------|-----------------------|-----------------------|-----------------------|---------------|-------------------------------------------------------------------|----------------------------------------------------------------------------|----------------------|----------------------|
|                            |             |                                                       | Gender [% female]      | Age [years] Mean (SD) | MMSE Mean (SD), range | Aetiology of dementia |               |                                                                   |                                                                            | Relative reliability | Absolute reliability |
| Werner et al., 2018 [99]   | n=97        | Geriatric hospital, care facility, community-dwelling | 74%                    | 82.5 (5.9)            | 21.0 (2.9), n.r.      | n.r.                  | (b) no cueing | Concurrent validity                                               | Point-biserial correlation coefficients                                    | N/A                  | N/A                  |
|                            |             |                                                       |                        |                       |                       |                       |               | Intra-rater reliability (repeated baseline scoring 4 weeks later) | Percentage agreement, Cohen's $\kappa$ ICC (3,1) with CI <sub>95</sub>     | Very good            | N/A                  |
|                            |             |                                                       |                        |                       |                       |                       |               | IRR                                                               | Percentage agreement, Cohen's $\kappa$ ICC (2,1) with CI <sub>95</sub>     | Very good            | N/A                  |
| Wiloth et al., 2016 [53]   | n=105 (74)* | Geriatric hospital, care facility, community dwelling | 72%                    | 82.7 (5.9)            | 21.9 (2.8), n.r.      | n.r.                  | (b) no cueing | Construct validity                                                | Spearman's rank correlations                                               | N/A                  | N/A                  |
|                            |             |                                                       |                        |                       |                       |                       |               | Between-day TRR (2-5 days)                                        | Spearman's rank correlations ICC (2-way mixed model) with CI <sub>95</sub> | Adequate             | N/A                  |
| Wittwer et al., 2008 [121] | n=20        | Community-dwelling                                    | 50%                    | 80.6 (5.2)            | 22.0 (3.5), 13-27     | AD                    | (b) no cueing | Between-day TRR (1 week)                                          | ICC (3,1) with CI <sub>95</sub> MDC <sub>95</sub> , CV                     | Adequate             | Adequate             |

**Table S2.** Study characteristics main search (Continued)

| Reference                | Sample size | Setting            | Sample characteristics |                       |                       |                       | Cueing   | Psychometric property (time interval if applicable) | Methodology                                               | COSMIN risk of bias  |                      |
|--------------------------|-------------|--------------------|------------------------|-----------------------|-----------------------|-----------------------|----------|-----------------------------------------------------|-----------------------------------------------------------|----------------------|----------------------|
|                          |             |                    | Gender [% female]      | Age [years] Mean (SD) | MMSE Mean (SD), range | Aetiology of dementia |          |                                                     |                                                           | Relative reliability | Absolute reliability |
| Wittwer et al., 2013 [5] | n=16        | Community-dwelling | 63%                    | 81.1 (5.2)            | 21.4 (4.0), 13-26     | AD                    | (a) n.r. | Between-day TRR (1 week)                            | ICC (3,1) with CI <sub>95</sub><br>SEM, MDC <sub>95</sub> | Adequate             | Adequate             |

AD: Alzheimer's disease, AM/PM: morning/afternoon measures, CI<sub>95</sub>: 95% confidence interval, COSMIN: COnsensus-based Standards for the selection of health Measurement INstruments, CV: coefficient of variation, ICC: intraclass correlation coefficient, IRR: inter-rater reliability, LBD: Lewy body disease, MD: mixed dementia (AD+VD), MDC: minimal detectable change with MDC<sub>95</sub>=SEM\*1.96\* $\sqrt{2}$ , MDC<sub>90</sub>=SEM\*1.65\* $\sqrt{2}$ , MDC<sub>%</sub>=(MDC<sub>95</sub> / mean)\*100, MMSE: Mini-Mental State Examination, n: number of participants, N/A: not applicable, n.r.: not reported, SD: standard deviation, SEM: standard error of measurement with SEM=SD\* $\sqrt{1-ICC}$ , SEM=SD\* $\sqrt{1-r}$ , SG0: subgroup borderline, SG1: subgroup mild dementia, SG1/2: subgroup mild to moderate dementia, SG2: subgroup moderate dementia, SG3: subgroup severe dementia, TRR: test-retest reliability, VD: vascular dementia

\* Reliability was assessed in a subgroup

## References

5. Wittwer JE, Webster KE, Hill K. Reproducibility of gait variability measures in people with Alzheimer's disease. *Gait Posture*. 2013;38:507–10. doi:10.1016/j.gaitpost.2013.01.021.
6. Ries JD, Echternach JL, Nof L, Gagnon Blodgett M. Test-retest reliability and minimal detectable change scores for the timed "up & go" test, the six-minute walk test, and gait speed in people with Alzheimer disease. *Phys Ther*. 2009;89:569–79. doi:10.2522/ptj.20080258.
14. Muir-Hunter SW, Graham L, Montero Odasso M. Reliability of the Berg Balance Scale as a Clinical Measure of Balance in Community-Dwelling Older Adults with Mild to Moderate Alzheimer Disease: A Pilot Study. *Physiother. Can*. 2015;67:255–62. doi:10.3138/ptc.2014-32.
15. Telenius EW, Engedal K, Bergland A. Inter-rater reliability of the Berg Balance Scale, 30 s chair stand test and 6 m walking test, and construct validity of the Berg Balance Scale in nursing home residents with mild-to-moderate dementia. *BMJ Open*. 2015;5:e008321. doi:10.1136/bmjopen-2015-008321.
17. Blankevoort CG, van Heuvelen MJG, Scherder EJA. Reliability of six physical performance tests in older people with dementia. *Phys Ther*. 2013;93:69–78. doi:10.2522/ptj.20110164.
26. McGough EL, Logsdon RG, Kelly VE, Teri L. Functional mobility limitations and falls in assisted living residents with dementia: Physical performance assessment and quantitative gait analysis. *J Geriatr Phys Ther*. 2013;36:78–86. doi:10.1519/JPT.0b013e318268de7f.
43. Lee HS, Park SW, Chung HK. The Korean version of relative and absolute reliability of gait and balance assessment tools for patients with dementia in day care center and nursing home. *J. Phys. Ther. Sci*. 2017;29:1934–9. doi:10.1589/jpts.29.1934.
51. Suttanon P, Hill KD, Dodd KJ, Said CM. Retest reliability of balance and mobility measurements in people with mild to moderate Alzheimer's disease. *Int Psychogeriatr*. 2011;23:1152–9. doi:10.1017/S1041610211000639.
53. Wiloth S, Lemke N, Werner C, Hauer K. Validation of a Computerized, Game-based Assessment Strategy to Measure Training Effects on Motor-Cognitive Functions in People With Dementia. *JMIR Serious Games*. 2016;4:e12. doi:10.2196/games.5696.
63. Bossers WJR, van der Woude LHV, Boersma F, Scherder EJA, van Heuvelen MJG. The Groningen Meander Walking Test: A dynamic walking test for older adults with dementia. *Phys Ther*. 2014;94:262–72. doi:10.2522/ptj.20130077.
99. Werner C, Wiloth S, Lemke NC, Kronbach F, Hauer K. Development and Validation of a Novel Motor-Cognitive Assessment Strategy of Compensatory Sit-to-Stand Maneuvers in People With Dementia. *J Geriatr Phys Ther*. 2018;41:143–54. doi:10.1519/JPT.000000000000116.
102. Thomas VS, Hageman PA. A preliminary study on the reliability of physical performance measures in older day-care center clients with dementia. *Int. Psychogeriatr*. 2002;14:17–23. doi:10.1017/S1041610202008244.
110. Graessel E, Viegas R, Stemmer R, Küchly B, Kornhuber J, Donath C. The Erlangen Test of Activities of Daily Living: First results on reliability and validity of a short performance test to measure fundamental activities of daily living in dementia patients. *Int. Psychogeriatr*. 2009;21:103–12. doi:10.1017/S1041610208007710.
111. Luttenberger K, Schmiedeberg A, Gräßel E. Activities of daily living in dementia: Revalidation of the E-ADL Test and suggestions for further development. *BMC Psychiatry*. 2012;12:208. doi:10.1186/1471-244X-12-208.
114. Suzuki M, Yamada S, Inamura A, Omori Y, Kirimoto H, Sugimura S, Miyamoto M. Reliability and validity of measurements of knee extension strength obtained from nursing home residents with dementia. *Am J Phys Med Rehabil*. 2009;88:924–33. doi:10.1097/PHM.0b013e3181ae1003.
115. Bronas UG, Salisbury D, Kelly K, Leon A, Chow L, Yu F. Determination of Aerobic Capacity via Cycle Ergometer Exercise Testing in Alzheimer's Disease. *Am J Alzheimers Dis Other Demen*. 2017;32:500–8. doi:10.1177/1533317517720065.



116. Suzuki M, Kirimoto H, Inamura A, Yagi M, Omori Y, Yamada S. The relationship between knee extension strength and lower extremity functions in nursing home residents with dementia. *Disabil. Rehabil.* 2012;34:202–9. doi:10.3109/09638288.2011.593678.
117. Schwenk M, Hauer K, Zieschang T, Englert S, Mohler J, Najafi B. Sensor-derived physical activity parameters can predict future falls in people with dementia. *Gerontology.* 2014;60:483–92. doi:10.1159/000363136.
118. Tappen RM, Roach KE, Buchner D, Barry C, Edelstein J. Reliability of Physical Performance Measures in Nursing Home Residents With Alzheimer's Disease. *J. Gerontol. Ser. A-Biol. Sci. Med. Sci.* 1997;52A:M52-M55. doi:10.1093/gerona/52A.1.M52.
120. Alencar MA, Dias JMD, Figueiredo LC, Dias RC. Handgrip strength in elderly with dementia: Study of reliability. *Rev Bras Fisioter.* 2012;16:510–4. doi:10.1590/S1413-35552012005000059.
121. Wittwer JE, Webster KE, Andrews PT, Menz HB. Test-retest reliability of spatial and temporal gait parameters of people with Alzheimer's disease. *Gait Posture.* 2008;28:392–6. doi:10.1016/j.gaitpost.2008.01.007.
