# Supplementary material for: Recommended motor assessments based on psychometric properties in individuals with dementia: a systematic review
Source: Springer Nature journal article supplement (doi:10.1186/s11556-019-0228-z), 2019-11-03
Supplement: MOESM7 [file 17344490]

## Additional file 7

### Data extraction first search

**Table S3.** Data extraction first search

| Refer-<br>ence                    | Motor assessments       |                        | CG                    |                   |                         | IG                                  |                                     |                         | Statistics / p-<br>value               | Effect size                          |                               |
|-----------------------------------|-------------------------|------------------------|-----------------------|-------------------|-------------------------|-------------------------------------|-------------------------------------|-------------------------|----------------------------------------|--------------------------------------|-------------------------------|
|                                   |                         |                        | Baseline<br>Mean (SD) | Post<br>Mean (SD) | Difference<br>Mean (SD) | Baseline<br>Mean (SD)               | Post<br>Mean (SD)                   | Difference<br>Mean (SD) |                                        | reported                             | calcu-<br>lated <sup>cc</sup> |
| Aguiar et<br>al., 2014<br>[86]    | TUG [s]                 |                        | 14.5 (4.9)            | 12.9 (4.2)        | -1.6 (2.4)              | 15.0 (5.2)                          | 15.0 (5.6)                          | 0.0 (1.7)               | p=0.062 <sup>a</sup>                   | n.r.                                 | 0.79                          |
| Arcoverde<br>et al., 2014<br>[56] | FR [cm]                 |                        | 19.0 (4.2)            | 18.3 (n.r.)       | -0.7 (4.3)              | 20.0 (4.3)                          | 25.1 (n.r.)                         | 5.1 (2.9)               | p=0.00 <sup>a</sup>                    | 1.48 <sup>y</sup>                    | 1.67                          |
|                                   | BBS                     |                        | n.r. (n.r.)           | n.r. (n.r.)       | n.r.                    | n.r. (n.r.)                         | n.r. (n.r.)                         | n.r.                    | p=0.00 <sup>b</sup>                    | 1.04 <sup>y</sup>                    | N/A                           |
|                                   | TUG [m/s]               |                        | n.r. (n.r.)           | n.r. (n.r.)       | n.r. (n.r.)             | n.r. (n.r.)                         | n.r. (n.r.)                         | n.r. (n.r.)             | p=0.00 <sup>b</sup>                    | 1.58 <sup>y</sup>                    | N/A                           |
|                                   | Cognitive TUG [m/s]     |                        | n.r. (n.r.)           | n.r. (n.r.)       | n.r. (n.r.)             | n.r. (n.r.)                         | n.r. (n.r.)                         | n.r. (n.r.)             | p=0.24 <sup>a</sup>                    | 1.03 <sup>y</sup>                    | N/A                           |
|                                   | 30s CST                 |                        | 9.0 (3.0)             | 8.5 (n.r.)        | -0.5 (0.9)              | 9.0 (2.0)                           | 10.0 (n.r.)                         | 1.0 (2.4)               | p=0.08 <sup>a</sup>                    | 0.50 <sup>y</sup>                    | 0.87                          |
| Bossers et<br>al., 2015<br>[50]   | FICSIT-4                |                        | 2.3 (1.4)             | 2.0 (1.4)         | n.r.                    | IG1: 2.3 (1.0)<br>IG2: 2.8 (1.2)    | IG1: 2.8 (0.9)<br>IG2: 2.5 (1.1)    | n.r.                    | F(2,105)=5.36,<br>p=0.024 <sup>c</sup> | CG vs.<br>IG1:<br>0.30 <sup>y</sup>  | N/A                           |
|                                   | Figure of<br>Eight Test | walking<br>speed [m/s] | 0.4 (0.3)             | 0.3 (0.3)         | n.r.                    | IG1: 0.3 (0.2)<br>IG2: 0.4 (0.3)    | IG1: 0.4 (0.3)<br>IG2: 0.4 (0.4)    | n.r.                    |                                        | CG vs.<br>IG2:<br>0.08 <sup>y</sup>  | N/A                           |
|                                   |                         | oversteps              | 9.0 (8.0)             | 9.7 (8.2)         | n.r.                    | IG1: 7.7 (7.6)<br>IG2: 5.9 (7.4)    | IG1: 7.3 (7.5)<br>IG2: 7.9 (7.7)    | n.r.                    |                                        | IG1 vs.<br>IG2:<br>0.33 <sup>y</sup> | N/A                           |
|                                   | GMWT                    | time [s]               | 21.5 (12.7)           | 21.2 (13.7)       | n.r.                    | IG1: 23.3 (12.7)<br>IG2: 18.7 (7.7) | IG1: 21.6 (11.4)<br>IG2: 19.0 (8.9) | n.r.                    |                                        |                                      | N/A                           |
|                                   |                         | oversteps              | 2.6 (2.9)             | 2.7 (2.7)         | n.r.                    | IG1: 2.1 (2.1)<br>IG2: 0.8 (1.6)    | IG1: 1.7 (2.4)<br>IG2: 1.1 (1.6)    | n.r.                    |                                        |                                      | N/A                           |

**Table S3.** Data extraction first search (*Continued*)

| Refer-<br>ence                  | Motor assessments                                    |                        | CG                    |                   |                         | IG                                            |                                                |                         | Statistics / p-<br>value               | Effect size                                                                                                        |                               |
|---------------------------------|------------------------------------------------------|------------------------|-----------------------|-------------------|-------------------------|-----------------------------------------------|------------------------------------------------|-------------------------|----------------------------------------|--------------------------------------------------------------------------------------------------------------------|-------------------------------|
|                                 |                                                      |                        | Baseline<br>Mean (SD) | Post<br>Mean (SD) | Difference<br>Mean (SD) | Baseline<br>Mean (SD)                         | Post<br>Mean (SD)                              | Difference<br>Mean (SD) |                                        | reported                                                                                                           | calcu-<br>lated <sup>cc</sup> |
| Bossers et<br>al., 2015<br>[50] | TUG [s]                                              |                        | 27.6 (18.8)           | 27.7 (19.2)       | n.r.                    | IG1: 23.0 (13.0)<br>IG2: 24.3 (14.0)          | IG1: 20.4 (9.2)<br>IG2: 23.8 (15.0)            | n.r.                    | F(2,105)=1.28,<br>p=0.282 <sup>c</sup> | CG vs.<br>IG1:<br>0.28 <sup>y</sup>                                                                                | N/A                           |
|                                 | 6m WT                                                | walking<br>speed [m/s] | 0.7 (0.3)             | 0.6 (0.3)         | n.r.                    | IG1: 0.7 (0.3)<br>IG2: 0.8 (0.3)              | IG1: 0.8 (0.3)<br>IG2: 0.7 (0.4)               | n.r.                    |                                        | CG vs.<br>IG2:<br>0.06 <sup>y</sup>                                                                                | N/A                           |
|                                 |                                                      | step length<br>[m]     | 0.4 (0.1)             | 0.4 (0.1)         | n.r.                    | IG1: 0.4 (0.1)<br>IG2: 0.4 (0.1)              | IG1: 0.4 (0.1)<br>IG2: 0.4 (0.1)               | n.r.                    |                                        | IG1 vs.<br>IG2:<br>0.26 <sup>y</sup>                                                                               | N/A                           |
|                                 | Modified 30s CST                                     |                        | 6.2 (4.8)             | 5.4 (6.3)         | n.r.                    | IG1: 6.8 (3.4)<br>IG2: 7.1 (4.4)              | IG1: 8.2 (3.6)<br>IG2: 6.3 (4.8)               | n.r.                    | F(2,105)=7.07,<br>p=0.004 <sup>c</sup> | CG vs.<br>IG1:<br>0.38 <sup>y</sup>                                                                                | N/A                           |
|                                 | Maximum knee extension<br>strength (dynamometer) [N] |                        | 218.9 (84.1)          | 203.2 (74.0)      | n.r.                    | IG1: 205.9<br>(91.0)<br>IG2: 196.0<br>(99.0)  | IG1: 208.8<br>(85.6)<br>IG2: 186.1<br>(84.3)   | n.r.                    |                                        | CG vs.<br>IG2:<br>0.04 <sup>y</sup><br>IG1 vs.<br>IG2:<br>0.36 <sup>y</sup>                                        | N/A                           |
|                                 | 6min WT [m]                                          |                        | 229.5<br>(136.4)      | 221.8<br>(159.5)  | n.r.                    | IG1: 217.6<br>(90.3)<br>IG2: 231.5<br>(136.4) | IG1: 267.2<br>(101.2)<br>IG2: 235.5<br>(148.7) | n.r.                    | F(2,105)=4.53,<br>p<0.049 <sup>c</sup> | CG vs.<br>IG1:<br>0.47 <sup>y</sup><br>CG vs.<br>IG2:<br>0.08 <sup>y</sup><br>IG1 vs.<br>IG2:<br>0.38 <sup>y</sup> | N/A                           |

**Table S3.** Data extraction first search (*Continued*)

| Reference                         | Motor assessments         |                       | CG                 |                |                          | IG                                 |                                    |                          | Statistics / p-value                                                                       | Effect size                                                                                               |                           |
|-----------------------------------|---------------------------|-----------------------|--------------------|----------------|--------------------------|------------------------------------|------------------------------------|--------------------------|--------------------------------------------------------------------------------------------|-----------------------------------------------------------------------------------------------------------|---------------------------|
|                                   |                           |                       | Baseline Mean (SD) | Post Mean (SD) | Difference Mean (SD)     | Baseline Mean (SD)                 | Post Mean (SD)                     | Difference Mean (SD)     |                                                                                            | reported                                                                                                  | calculated <sup>cc</sup>  |
| Bossers et al., 2016 [112]        | Physical Performance Test |                       | 12.9 (5.9)         | 11.2 (6.4)     | n.r.                     | IG1: 12.9 (3.4)<br>IG2: 13.4 (5.1) | IG1: 14.2 (3.5)<br>IG2: 13.2 (4.9) | n.r.                     | Chi <sup>2</sup> (2)=11.93,<br>p=0.003 <sup>d</sup>                                        | CG vs. IG1:<br>0.62 <sup>y</sup><br>CG vs. IG2:<br>0.29 <sup>y</sup><br>IG1 vs. IG2:<br>0.36 <sup>y</sup> | N/A                       |
|                                   | E-ADL Test                |                       | 26.9 (3.4)         | 25.3 (5.1)     | n.r.                     | IG1: 26.5 (3.7)<br>IG2: 26.8 (3.5) | IG1: 28.1 (2.7)<br>IG2: 27.3 (3.8) | n.r.                     | Chi <sup>2</sup> (2)=16.40,<br>p<0.001 <sup>d</sup>                                        | CG vs. IG1:<br>0.85 <sup>y</sup><br>CG vs. IG2:<br>0.53 <sup>y</sup><br>IG1 vs. IG2:<br>0.31 <sup>y</sup> | N/A                       |
| Burgener et al., 2008 [65]        | Single leg stance [s]     | left leg, eyes closed | 1.7 (1.1)          | 3.6 (4.8)      | 1.9 (n.r.)               | 3.4 (6.8)                          | 6.3 (14.2)                         | 2.9 (n.r.)               | IG: n.s. <sup>e</sup><br>p=0.62 <sup>f</sup>                                               | n.r.                                                                                                      | N/A                       |
|                                   |                           | right leg, eyes open  | 6.0 (5.5)          | 3.7 (2.1)      | -2.3 (n.r.)              | 5.9 (5.6)                          | 10.4 (15.5)                        | 4.5 (n.r.)               | IG: n.s. <sup>e</sup><br>p=0.09 <sup>f</sup>                                               | n.r.                                                                                                      | N/A                       |
|                                   | BBS                       |                       | 50.8 (4.2)         | 50.5 (3.5)     | -0.3 (n.r.)              | 49.1 (5.0)                         | 50.8 (4.3)                         | 1.7 (n.r.)               | p=0.87 <sup>f</sup>                                                                        | n.r.                                                                                                      | N/A                       |
| Cancela et al., 2016 [82]         | TUG [s]                   |                       | 23.4 (6.9)         | n.r.           | -0.6 (n.r.)              | 24.0 (10.1)                        | n.r.                               | -2.1 (n.r.)              | F(1,187)=5.43,<br>p=0.03 <sup>g</sup><br>F(1,111)=4.10,<br>p=0.04 <sup>h*</sup>            | n.r.                                                                                                      | 0.35<br>0.38 <sup>*</sup> |
|                                   |                           |                       |                    |                | -1.8 (n.r.) <sup>*</sup> |                                    |                                    | -3.0 (n.r.) <sup>*</sup> |                                                                                            |                                                                                                           |                           |
| Christofolletti et al., 2008 [66] | BBS                       |                       | 35.2 (2.6)         | 27.4 (3.2)     | n.r.                     | IG1: 39.5 (1.9)<br>IG2: 37.4 (2.0) | IG1: 41.7 (2.4)<br>IG2: 37.7 (2.8) | n.r.                     | CG vs. IG1:<br>F=10.3,<br>p<0.05 <sup>i</sup><br>CG vs. IG2:<br>F=7.9, p<0.05 <sup>i</sup> | n.r.                                                                                                      | N/A                       |

**Table S3.** Data extraction first search (*Continued*)

| Reference                         | Motor assessments           |                  | CG                 |                |                      | IG                                   |                                      |                      | Statistics / p-value                                                                                                         | Effect size |                          |
|-----------------------------------|-----------------------------|------------------|--------------------|----------------|----------------------|--------------------------------------|--------------------------------------|----------------------|------------------------------------------------------------------------------------------------------------------------------|-------------|--------------------------|
|                                   |                             |                  | Baseline Mean (SD) | Post Mean (SD) | Difference Mean (SD) | Baseline Mean (SD)                   | Post Mean (SD)                       | Difference Mean (SD) |                                                                                                                              | reported    | calculated <sup>cc</sup> |
| Christofolletti et al., 2008 [66] | TUG                         | time [s]         | 30.6 (6.5)         | 35.6 (8.6)     | n.r.                 | IG1: 13.7 (1.2)<br>IG2: 22.3 (4.4)   | IG1: 12.9 (1.0)<br>IG2: 22.1 (4.0)   | n.r.                 | n.s. <sup>i</sup>                                                                                                            | n.r.        | N/A                      |
|                                   |                             | steps            | 31.3 (4.2)         | 35.3 (6.4)     | n.r.                 | IG1: 19.9 (1.4)<br>IG2: 28.2 (3.6)   | IG1: 18.3 (1.2)<br>IG2: 25.5 (3.6)   | n.r.                 | n.s. <sup>i</sup>                                                                                                            | n.r.        | N/A                      |
| Cott et al., 2002 [124]           | 2-min walk test [m]         |                  | 48.0 (28.8)        | 47.7 (33.8)    | n.r.                 | IG1: 52.8 (27.6)<br>IG2: 52.6 (24.2) | IG1: 53.3 (27.5)<br>IG2: 56.4 (34.4) | n.r.                 | n.s. <sup>e,i</sup>                                                                                                          | n.r.        | N/A                      |
| Dawson et al., 2019 [74]          | Modified BBS                |                  | 38.5 (8.0)         | 36.6 (8.7)     | n.r.                 | 39.5 (3.3)                           | 41.5 (2.2)                           | n.r.                 | B=4.0, $\beta=0.3$ ,<br>t=4.1, p=0.001 <sup>k</sup>                                                                          | n.r.        | N/A                      |
|                                   | 8-foot walk test [m/s]      | comfortable pace | 0.7 (0.2)          | 0.6 (0.3)      | n.r.                 | 0.7 (0.2)                            | 0.7 (0.1)                            | n.r.                 | B=0.01, $\beta=0.2$ ,<br>t=0.6, p=0.6 <sup>k</sup>                                                                           | n.r.        | N/A                      |
|                                   |                             | fast pace        | 1.4 (0.6)          | 1.3 (0.6)      | n.r.                 | 1.2 (0.3)                            | 1.6 (0.3)                            | n.r.                 | B=0.3, $\beta=0.4$ ,<br>t=2.6, p=0.02 <sup>k</sup>                                                                           | n.r.        | N/A                      |
|                                   | 30s CST                     |                  | 15.7 (6.1)         | 13.2 (4.9)     | n.r.                 | 14.0 (5.8)                           | 17.9 (6.8)                           | n.r.                 | B=5.9, $\beta=0.5$ ,<br>t=3.3, p=0.004 <sup>k</sup>                                                                          | n.r.        | N/A                      |
| Francese et al., 1997 [76]        | POMA                        |                  | 1.8 (2.1)          | 0.4 (0.9)      | n.r.                 | 3.0 (2.8)                            | 8.7 (4.3)                            | n.r.                 | t(10)=2.00,<br>p<0.05 <sup>f</sup><br>CG: t(4)=-1.00,<br>p $\geq$ 0.05 <sup>e</sup><br>IG: t(5)=3.00,<br>p=0.05 <sup>e</sup> | n.r.        | N/A                      |
|                                   | Physical therapy assessment |                  | 38.8 (34.7)        | 43.6 (37.7)    | n.r.                 | 63.8 (18.3)                          | 89.7 (10.0)                          | n.r.                 | t(10)=3.20,<br>p=0.01 <sup>f</sup><br>CG: t(4)=0.83,<br>p $\geq$ 0.05 <sup>e</sup><br>IG: t(5)=4.33,<br>p=0.01 <sup>e</sup>  | n.r.        | N/A                      |

**Table S3.** Data extraction first search (*Continued*)

| Reference               | Motor assessments                                                         |                                                                           | CG                 |                |                      | IG                 |                |                      | Statistics / p-value | Effect size          |                          |
|-------------------------|---------------------------------------------------------------------------|---------------------------------------------------------------------------|--------------------|----------------|----------------------|--------------------|----------------|----------------------|----------------------|----------------------|--------------------------|
|                         |                                                                           |                                                                           | Baseline Mean (SD) | Post Mean (SD) | Difference Mean (SD) | Baseline Mean (SD) | Post Mean (SD) | Difference Mean (SD) |                      | reported             | calculated <sup>cc</sup> |
| Hauer et al., 2017 [77] | POMA                                                                      | total score                                                               | 18.4 (7.0)         | 18.6 (5.2)     | n.r.                 | 18.6 (7.5)         | 23.0 (4.4)     | n.r.                 | p=0.006 <sup>i</sup> | 0.25 <sup>z</sup>    | N/A                      |
|                         |                                                                           | balance score                                                             | 11.5 (3.4)         | 11.7 (1.8)     | n.r.                 | 11.0 (3.4)         | 13.3 (1.7)     | n.r.                 | p=0.034 <sup>i</sup> | 0.16 <sup>z</sup>    | N/A                      |
|                         |                                                                           | gait score                                                                | 6.9 (3.9)          | 6.9 (3.9)      | n.r.                 | 7.6 (4.5)          | 9.7 (2.8)      | n.r.                 | p=0.019 <sup>i</sup> | 0.19 <sup>z</sup>    | N/A                      |
|                         | Body-fixed-sensor-based STS analysis (DynaPort): sit-to-stand performance | duration [s]                                                              | 2.0 (0.6)          | 2.5 (0.9)      | n.r.                 | 1.8 (0.4)          | 1.4 (0.2)      | n.r.                 | p=0.064 <sup>i</sup> | 0.30 <sup>z</sup>    | N/A                      |
|                         |                                                                           | hip flexion, duration [s]                                                 | 1.0 (0.4)          | 1.1 (0.4)      | n.r.                 | 0.9 (0.2)          | 0.8 (0.2)      | n.r.                 | p=0.451 <sup>i</sup> | 0.06 <sup>z</sup>    | N/A                      |
|                         |                                                                           | hip extension, duration [s]                                               | 0.9 (0.2)          | 1.4 (0.6)      | n.r.                 | 0.9 (0.3)          | 0.6 (0.1)      | n.r.                 | p=0.018 <sup>i</sup> | 0.44 <sup>z</sup>    | N/A                      |
|                         |                                                                           | hip flexion, max. angular velocity [°/s]                                  | 74.0 (21.1)        | 60.4 (10.0)    | n.r.                 | 86.2 (35.9)        | 106.0 (54.5)   | n.r.                 | p=0.239 <sup>i</sup> | 0.14 <sup>z</sup>    | N/A                      |
|                         |                                                                           | hip extension, max. angular velocity [°/s]                                | 46.9 (26.5)        | 41.4 (15.4)    | n.r.                 | 42.2 (22.7)        | 37.7 (17.5)    | n.r.                 | p=0.919 <sup>i</sup> | 0.001 <sup>z</sup>   | N/A                      |
|                         |                                                                           | Body-fixed-sensor-based STS analysis (DynaPort): stand-to-sit performance | duration [s]       | 2.0 (0.8)      | 2.4 (0.7)            | n.r.               | 2.2 (0.5)      | 1.5 (0.3)            | n.r.                 | p=0.014 <sup>i</sup> | 0.47 <sup>z</sup>        |
|                         | hip flexion, duration [s]                                                 |                                                                           | 1.0 (0.4)          | 1.3 (0.3)      | n.r.                 | 1.1 (0.3)          | 0.7 (0.2)      | n.r.                 | p=0.015 <sup>i</sup> | 0.46 <sup>z</sup>    | N/A                      |
|                         | hip extension, duration [s]                                               |                                                                           | 0.9 (0.4)          | 1.1 (0.4)      | n.r.                 | 1.0 (0.2)          | 0.8 (0.2)      | n.r.                 | p=0.044 <sup>i</sup> | 0.35 <sup>z</sup>    | N/A                      |
|                         | hip flexion, max. angular velocity [°/s]                                  |                                                                           | 36.8 (17.7)        | 31.5 (12.4)    | n.r.                 | 41.1 (13.8)        | 46.5 (27.1)    | n.r.                 | p=0.369 <sup>i</sup> | 0.08 <sup>z</sup>    | N/A                      |

**Table S3.** Data extraction first search (*Continued*)

| Reference               | Motor assessments                                                         |                                            | CG                     |                |                      | IG                 |                |                      | Statistics / p-value | Effect size          |                          |     |
|-------------------------|---------------------------------------------------------------------------|--------------------------------------------|------------------------|----------------|----------------------|--------------------|----------------|----------------------|----------------------|----------------------|--------------------------|-----|
|                         |                                                                           |                                            | Baseline Mean (SD)     | Post Mean (SD) | Difference Mean (SD) | Baseline Mean (SD) | Post Mean (SD) | Difference Mean (SD) |                      | reported             | calculated <sup>cc</sup> |     |
| Hauer et al., 2017 [77] | Body-fixed-sensor-based STS analysis (DynaPort): stand-to-sit performance | hip extension, max. angular velocity [°/s] | 81.8 (39.0)            | 52.5 (10.3)    | n.r.                 | 75.3 (22.6)        | 107.7 (50.1)   | n.r.                 | p=0.006 <sup>i</sup> | 0.55 <sup>z</sup>    | N/A                      |     |
|                         |                                                                           | SPPB                                       | total score            | 4.4 (2.9)      | 4.7 (2.4)            | n.r.               | 5.0 (2.7)      | 7.0 (2.7)            | n.r.                 | p=0.010 <sup>i</sup> | 0.23 <sup>z</sup>        | N/A |
|                         |                                                                           |                                            | chair rise score       | 0.7 (1.3)      | 0.7 (1.1)            | n.r.               | 0.6 (0.8)      | 1.5 (1.4)            | n.r.                 | p=0.007 <sup>i</sup> | 0.25 <sup>z</sup>        | N/A |
|                         |                                                                           |                                            | balance score          | 2.6 (.7)       | 2.7 (.7)             | n.r.               | 2.9 (.9)       | 3.6 (0.7)            | n.r.                 | p=0.066 <sup>i</sup> | 0.12 <sup>z</sup>        | N/A |
|                         |                                                                           |                                            | gait score             | 1.1 (1.4)      | 1.3 (1.1)            | n.r.               | 1.4 (1.3)      | 1.9 (1.3)            | n.r.                 | p=0.395 <sup>i</sup> | 0.03 <sup>z</sup>        | N/A |
|                         |                                                                           |                                            | 8-foot walk test [m/s] | 0.4 (0.2)      | 0.4 (0.2)            | n.r.               | 0.5 (0.2)      | 0.6 (0.2)            | n.r.                 | p=0.153 <sup>i</sup> | 0.12 <sup>z</sup>        | N/A |
|                         |                                                                           |                                            | 5x STS [s]             | 19.1 (9.8)     | 24.4 (12.0)          | n.r.               | 20.9 (5.7)     | 16.0 (4.0)           | n.r.                 | p=0.009 <sup>i</sup> | 0.45 <sup>z</sup>        | N/A |
| Hauer et al., 2012 [78] | POMA                                                                      | total score                                | 19.8 (5.4)             | 20.6 (6.0)     | n.r.                 | 20.1 (4.8)         | 24.5 (3.7)     | n.r.                 | p<0.001 <sup>c</sup> | 0.22 <sup>aa</sup>   | N/A                      |     |
|                         |                                                                           |                                            | balance score          | 10.8 (3.1)     | 11.1 (3.2)           | n.r.               | 10.8 (2.8)     | 13.2 (1.9)           | n.r.                 | p<0.001 <sup>c</sup> | 0.23 <sup>aa</sup>       | N/A |
|                         |                                                                           |                                            | gait score             | 9.0 (2.7)      | 9.4 (3.1)            | n.r.               | 9.3 (2.3)      | 11.4 (1.9)           | n.r.                 | p<0.001 <sup>c</sup> | 0.19 <sup>aa</sup>       | N/A |
|                         |                                                                           | TUG [s]                                    | 17.9 (16.0)            | 17.5 (17.3)    | n.r.                 | 14.9 (6.7)         | 11.2 (4.5)     | n.r.                 | p=0.009 <sup>c</sup> | 0.06 <sup>aa</sup>   | N/A                      |     |
|                         |                                                                           | Handgrip dynamometer [KPa]                 | 59.7 (16.6)            | 59.7 (15.7)    | n.r.                 | 59.1 (17.8)        | 60.9 (17.4)    | n.r.                 | p=0.55 <sup>c</sup>  | 0.004 <sup>aa</sup>  | N/A                      |     |
|                         |                                                                           | One-repetition maximum in leg press [kg]   | 140.9 (44.0)           | 136.5 (45.4)   | n.r.                 | 148.7 (57.9)       | 225.2 (79.7)   | n.r.                 | p<0.001 <sup>c</sup> | 0.43 <sup>aa</sup>   | N/A                      |     |

**Table S3.** Data extraction first search (*Continued*)

| Reference                    | Motor assessments                        |                     | CG                 |                |                      | IG                 |                |                      | Statistics / p-value                                                                       | Effect size        |                          |
|------------------------------|------------------------------------------|---------------------|--------------------|----------------|----------------------|--------------------|----------------|----------------------|--------------------------------------------------------------------------------------------|--------------------|--------------------------|
|                              |                                          |                     | Baseline Mean (SD) | Post Mean (SD) | Difference Mean (SD) | Baseline Mean (SD) | Post Mean (SD) | Difference Mean (SD) |                                                                                            | reported           | calculated <sup>cc</sup> |
| Hauer et al., 2012 [78]      | Maximum isometric strength (dynamometer) | knee extension [N]  | 65.8 (24.8)        | 66.8 (25.5)    | n.r.                 | 68.3 (27.3)        | 81.3 (27.4)    | n.r.                 | p<0.001 <sup>c</sup>                                                                       | 0.12 <sup>aa</sup> | N/A                      |
|                              |                                          | knee extension [Ns] | 267.7 (101.9)      | 270.5 (103.0)  | n.r.                 | 277.2 (114.4)      | 324.6 (122.6)  | n.r.                 | p=0.001 <sup>c</sup>                                                                       | 0.09 <sup>aa</sup> | N/A                      |
|                              |                                          | knee flexion [N]    | 31.4 (12.1)        | 34.9 (12.9)    | n.r.                 | 33.3 (12.6)        | 43.7 (14.5)    | n.r.                 | p<0.001 <sup>c</sup>                                                                       | 0.15 <sup>aa</sup> | N/A                      |
|                              |                                          | knee flexion [Ns]   | 137.2 (52.7)       | 143.5 (54.9)   | n.r.                 | 145.1 (55.3)       | 178.2 (61.3)   | n.r.                 | p<0.001 <sup>c</sup>                                                                       | 0.14 <sup>aa</sup> | N/A                      |
|                              |                                          | ankle flexion [N]   | 52.3 (21.8)        | 52.5 (23.7)    | n.r.                 | 56.5 (24.7)        | 63.1 (26.1)    | n.r.                 | p=0.01 <sup>c</sup>                                                                        | 0.06 <sup>aa</sup> | N/A                      |
|                              |                                          | ankle flexion [Ns]  | 212.6 (93.2)       | 214.3 (99.0)   | n.r.                 | 229.0 (100.3)      | 257.1 (107.5)  | n.r.                 | p=0.01 <sup>c</sup>                                                                        | 0.06 <sup>aa</sup> | N/A                      |
|                              | Gait performance                         | walking speed [m/s] | 0.9 (0.3)          | 1.0 (0.3)      | n.r.                 | 0.9 (0.3)          | 1.2 (0.4)      | n.r.                 | p<0.001 <sup>c</sup>                                                                       | 0.28 <sup>aa</sup> | N/A                      |
|                              |                                          | step length [m]     | 0.5 (0.1)          | 0.5 (0.1)      | n.r.                 | 0.5 (0.2)          | 0.6 (0.1)      | n.r.                 | p<0.001 <sup>c</sup>                                                                       | 0.16 <sup>aa</sup> | N/A                      |
|                              |                                          | cadence [steps/min] | 116.7 (18.9)       | 117.9 (20.7)   | n.r.                 | 117.1 (18.7)       | 131.7 (17.1)   | n.r.                 | p<0.001 <sup>c</sup>                                                                       | 0.18 <sup>aa</sup> | N/A                      |
|                              | 5x STS [s]                               |                     | 17.6 (9.3)         | 19.7 (15.9)    | n.r.                 | 17.3 (6.8)         | 11.8 (3.2)     | n.r.                 | p<0.001 <sup>c</sup>                                                                       | 0.15 <sup>aa</sup> | N/A                      |
|                              | Stair-climbing performance [s]           |                     | 16.0 (11.0)        | 14.7 (12.4)    | n.r.                 | 13.3 (6.6)         | 9.8 (4.0)      | n.r.                 | p=0.006 <sup>c</sup>                                                                       | 0.07 <sup>aa</sup> | N/A                      |
| Henskens et al., 2018 [113]  | E-ADL Test                               |                     | n.r.               | n.r.           | n.r.                 | n.r.               | n.r.           | n.r.                 | n.r.                                                                                       | n.r.               | N/A                      |
| Kampragkou et al., 2017 [83] | One Leg Standing Balance Test [s]        |                     | 4.0 (2.2)          | 3.5 (2.2)      | n.r.                 | 4.4 (3.1)          | 5.7 (3.0)      | n.r.                 | F(1,26)=39.03, p<0.05 <sup>i</sup><br>CG: p>0.05 <sup>l</sup><br>IG: p=0.0001 <sup>l</sup> | n.r.               | 2.36                     |

**Table S3.** Data extraction first search (*Continued*)

| Refer-<br>ence                       | Motor assessments            |                                                    | CG                    |                   |                         | IG                    |                   |                         | Statistics / p-<br>value                                                                    | Effect size |                               |
|--------------------------------------|------------------------------|----------------------------------------------------|-----------------------|-------------------|-------------------------|-----------------------|-------------------|-------------------------|---------------------------------------------------------------------------------------------|-------------|-------------------------------|
|                                      |                              |                                                    | Baseline<br>Mean (SD) | Post<br>Mean (SD) | Difference<br>Mean (SD) | Baseline<br>Mean (SD) | Post<br>Mean (SD) | Difference<br>Mean (SD) |                                                                                             | reported    | calcu-<br>lated <sup>cc</sup> |
| Kamprag-<br>kou et al.,<br>2017 [83] | TUG [s]                      |                                                    | 19.7 (4.4)            | 21.1 (4.8)        | n.r.                    | 19.3 (5.0)            | 18.2 (4.2)        | n.r.                    | F(1,26)=22.09,<br>p<0.05 <sup>i</sup><br>CG: p>0.05 <sup>n</sup><br>IG: p>0.05 <sup>n</sup> | n.r.        | 1.78                          |
| Kemoun et<br>al., 2010<br>[96]       | Gait<br>analysis             | walking<br>speed [m/s]                             | 0.9 (0.2)             | 0.8 (0.2)         | n.r.                    | 0.7 (0.1)             | 1.0 (0.2)         | n.r.                    | F(1,29)=53.4,<br>p=0.01 <sup>i</sup>                                                        | n.r.        | 2.72                          |
|                                      |                              | stride length<br>[m]                               | 1.0 (0.2)             | 0.9 (0.2)         | n.r.                    | 0.9 (0.2)             | 1.0 (0.2)         | n.r.                    | F(1,29)=16.3,<br>p=0.01 <sup>i</sup>                                                        | n.r.        | 1.50                          |
|                                      |                              | double limb<br>support time<br>[s]                 | 0.1 (0.0)             | 0.1 (0.0)         | n.r.                    | 0.2 (0.0)             | 0.1 (0.0)         | n.r.                    | F(1,29)=27.0,<br>p=0.01 <sup>i</sup>                                                        | n.r.        | 1.93                          |
| Kim et al.,<br>2016 [67]             | BBS                          |                                                    | n.r.                  | n.r.              | n.r.                    | 28.2 (17.6)           | 21.5 (17.3)       | n.r.                    | IG: p=0.04 <sup>m</sup>                                                                     | n.r.        | N/A                           |
|                                      | Handgrip dynamometer<br>[kg] |                                                    | n.r.                  | n.r.              | n.r.                    | 7.9 (5.9)             | 11.8 (7.7)        | n.r.                    | IG: p=0.02 <sup>m</sup>                                                                     | n.r.        | N/A                           |
|                                      | Pedal<br>Power               | pedal<br>rotation                                  | n.r.                  | n.r.              | n.r.                    | 97.7 (89.9)           | 285.8 (197.5)     | n.r.                    | IG: p=0.004 <sup>m</sup>                                                                    | n.r.        | N/A                           |
|                                      |                              | total load<br>[W*number<br>of pedal<br>rotation/s] | n.r.                  | n.r.              | n.r.                    | 6.3 (7.5)             | 10.0 (6.8)        | n.r.                    | IG: p=0.06 <sup>m</sup>                                                                     | n.r.        | N/A                           |
| Kovács et<br>al., 2013<br>[79]       | POMA                         | total score                                        | 10 (n.r.)             | 11 (n.r.)         | n.r.                    | 14 (n.r.)             | 17 (n.r.)         | n.r.                    | CG: p=0.624 <sup>n</sup><br>IG: p<0.0001 <sup>n</sup>                                       | n.r.        | N/A                           |
|                                      |                              | balance<br>score                                   | 6 (n.r.)              | 7 (n.r.)          | n.r.                    | 7 (n.r.)              | 11 (n.r.)         | n.r.                    | CG: p=0.640 <sup>n</sup><br>IG: p<0.0001 <sup>n</sup>                                       | n.r.        | N/A                           |
|                                      |                              | gait score                                         | 4 (n.r.)              | 4 (n.r.)          | n.r.                    | 5 (n.r.)              | 7 (n.r.)          | n.r.                    | CG: p=0.530 <sup>n</sup><br>IG: p<0.0001 <sup>n</sup>                                       | n.r.        | N/A                           |
|                                      | TUG [s]                      |                                                    | 32.1 (n.r.)           | 33.3 (n.r.)       | n.r.                    | 32.6 (n.r.)           | 31.1              | n.r.                    | CG: p=0.171 <sup>n</sup><br>IG: p<0.0001 <sup>n</sup>                                       | n.r.        | N/A                           |



**Table S3.** Data extraction first search (Continued)

| Reference                    | Motor assessments |               | CG                 |                |                      | IG                 |                |                      | Statistics / p-value          | Effect size        |                          |
|------------------------------|-------------------|---------------|--------------------|----------------|----------------------|--------------------|----------------|----------------------|-------------------------------|--------------------|--------------------------|
|                              |                   |               | Baseline Mean (SD) | Post Mean (SD) | Difference Mean (SD) | Baseline Mean (SD) | Post Mean (SD) | Difference Mean (SD) |                               | reported           | calculated <sup>cc</sup> |
| Lam et al., 2018 [68]        | BBS               |               | 42.5 (10.7)        | 45.5 (10.6)    | 3.1 (n.r.)           | 43.6 (9.7)         | 45.2 (8.9)     | 1.6 (n.r.)           | p=0.571 <sup>o</sup>          | 0.011 <sup>z</sup> | N/A                      |
|                              | POMA              | total score   | 24.3 (5.8)         | 25.4 (5.5)     | 1.2 (n.r.)           | 25.4 (3.8)         | 26.0 (4.0)     | 0.6 (n.r.)           | p=0.382 <sup>o</sup>          | 0.017 <sup>z</sup> | N/A                      |
|                              |                   | balance score | 14.1 (2.3)         | 14.0 (3.4)     | 0.7 (n.r.)           | 14.1 (2.3)         | 14.7 (2.4)     | 0.7 (n.r.)           | p=0.705 <sup>o</sup>          | 0.006 <sup>z</sup> | N/A                      |
|                              |                   | gait score    | 11.3 (1.6)         | 11.4 (2.3)     | 0.5 (n.r.)           | 11.3 (1.6)         | 11.3 (1.8)     | -0.1 (n.r.)          | p=0.178 <sup>o</sup>          | 0.034 <sup>z</sup> | N/A                      |
|                              | TUG [s]           |               | 23.0 (15.7)        | 21.3 (15.9)    | -1.8 (n.r.)          | 20.3 (10.5)        | 19.8 (12.6)    | -0.5 (n.r.)          | p=0.707 <sup>o</sup>          | 0.006 <sup>z</sup> | N/A                      |
|                              | 5x STS [s]        |               | 25.7 (16.6)        | 22.9 (11.2)    | -2.8 (n.r.)          | 21.6 (8.2)         | 21.0 (8.4)     | -0.6 (n.r.)          | p=0.720 <sup>o</sup>          | 0.006 <sup>z</sup> | N/A                      |
| Miu et al., 2008 [57]        | FR [cm]           |               | 19.9 (8.3)         | n.r.           | n.r.                 | 19.7 (7)           | n.r.           | n.r.                 | IG: p=0.007 <sup>m</sup>      | n.r.               | N/A                      |
|                              | BBS               |               | n.r.               | n.r.           | n.r.                 | n.r.               | n.r.           | n.r.                 | IG: p<0.001 <sup>m</sup>      | n.r.               | N/A                      |
|                              | 6min WT [m]       |               | 264 (100)          | n.r.           | n.r.                 | 245 (90)           | n.r.           | 38 (42)              | IG: p<0.001 <sup>m</sup>      | n.r.               | N/A                      |
| Netz et al., 2007 [58]       | FR [cm]           |               | 19.3 (10.3)        | 22.9 (7.0)     | 3.6 (SE: 3.7)        | 20.1 (7.9)         | 21.7 (6.9)     | 1.6 (SE: 1.3)        | n.s. <sup>i</sup>             | n.r.               | 0.27                     |
|                              | TUG [s]           |               | 16.5 (9.3)         | 14.7 (7.3)     | -1.8 (SE: 0.8)       | 17.8 (8.4)         | 18.1 (8.8)     | 0.3 (SE:0.7)         | n.s. <sup>i</sup>             | n.r.               | 0.85                     |
|                              | 5x STS [s]        |               | 14.0 (4.1)         | 14.6 (4.1)     | 0.6 (SE: 1.0)        | 15.4 (4.2)         | 16.1 (5.8)     | 0.7 (SE: 1.0)        | n.s. <sup>i</sup>             | n.r.               | 0.03                     |
| Padala et al., 2017 [69]     | BBS               |               | 45.8 (2.5)         | n.r.           | n.r.                 | 46.5 (2.4)         | n.r.           | n.r.                 | p=0.048 <sup>i</sup>          | n.r.               | N/A                      |
| Padala et al., 2012 [70]     | BBS               |               | 41.3 (7.6)         | 46.6 (8.7)     | n.r.                 | 43.4 (8.9)         | 49.6 (5.7)     | n.r.                 | p=0.56 <sup>i</sup>           | n.r.               | N/A                      |
|                              | POMA              |               | 22.9 (2.6)         | 24.9 (3.4)     | n.r.                 | 23.5 (3.7)         | 25.3 (2.8)     | n.r.                 | p=0.97 <sup>i</sup>           | n.r.               | N/A                      |
|                              | TUG [s]           |               | 14.9 (4.7)         | 12.8 (3.2)     | n.r.                 | 14.7 (7.2)         | 13.9 (7.9)     | n.r.                 | p=0.52 <sup>i</sup>           | n.r.               | N/A                      |
| Pedrinolla et al., 2018 [93] | Gait analysis     | speed [cm/s]  | 92.3 (5.7)         | n.r.           | n.r.                 | 92.5 (10.2)        | n.r.           | n.r.                 | z=-1.77, p=0.076 <sup>p</sup> | n.r.               | N/A                      |

**Table S3.** Data extraction first search (*Continued*)

| Refer-<br>ence                     | Motor assessments                                                                |                       | CG                    |                   |                                  | IG                    |                   |                         | Statistics / p-<br>value         | Effect size |                               |
|------------------------------------|----------------------------------------------------------------------------------|-----------------------|-----------------------|-------------------|----------------------------------|-----------------------|-------------------|-------------------------|----------------------------------|-------------|-------------------------------|
|                                    |                                                                                  |                       | Baseline<br>Mean (SD) | Post<br>Mean (SD) | Difference<br>Mean (SD)          | Baseline<br>Mean (SD) | Post<br>Mean (SD) | Difference<br>Mean (SD) |                                  | reported    | calcu-<br>lated <sup>cc</sup> |
| Pedrinolla<br>et al., 2018<br>[93] | Gait<br>analysis                                                                 | stride [cm]           | 104.3 (4.6)           | n.r.              | n.r.                             | 111.3 (7.2)           | n.r.              | n.r.                    | z=-0.86,<br>p=0.391 <sup>p</sup> | n.r.        | N/A                           |
|                                    |                                                                                  | step [cm]             | 52.0 (2.3)            | n.r.              | n.r.                             | 55.7 (3.6)            | n.r.              | n.r.                    | z=-0.72,<br>p=0.471 <sup>p</sup> | n.r.        | N/A                           |
|                                    |                                                                                  | single<br>support [%] | 36.1 (0.4)            | n.r.              | n.r.                             | 37.2 (1.1)            | n.r.              | n.r.                    | z=0.00,<br>p=1.000 <sup>p</sup>  | n.r.        | N/A                           |
|                                    |                                                                                  | double<br>support [%] | 27.5 (0.9)            | n.r.              | n.r.                             | 26.2 (1.3)            | n.r.              | n.r.                    | z=0.85,<br>p=0.394 <sup>p</sup>  | n.r.        | N/A                           |
|                                    | 3-speed<br>walking test,<br>VO <sub>2</sub><br>[ml/min*kg <sup>-1</sup> ]        | speed 1               | 11.0 (0.9)            | n.r.              | n.r.                             | 13.3 (0.6)            | n.r.              | n.r.                    | t=2.28,<br>p=0.030 <sup>a</sup>  | n.r.        | 0.81                          |
|                                    |                                                                                  | speed 2               | 12.0 (0.8)            | n.r.              | n.r.                             | 12.0 (0.6)            | n.r.              | n.r.                    | t=2.94,<br>p=0.006 <sup>a</sup>  | n.r.        | 1.04                          |
|                                    |                                                                                  | speed 3               | 17.1 (1.0)            | n.r.              | n.r.                             | 14.8 (0.7)            | n.r.              | n.r.                    | t=2.09,<br>p=0.054 <sup>a</sup>  | n.r.        | 0.74                          |
|                                    | 3-speed<br>walking test,<br>heart rate<br>[bpm]                                  | speed 1               | 93.0 (2.8)            | n.r.              | n.r.                             | 98.3 (2.3)            | n.r.              | n.r.                    | t=1.58,<br>p=0.126 <sup>a</sup>  | n.r.        | 0.56                          |
|                                    |                                                                                  | speed 2               | 99.2 (2.8)            | n.r.              | n.r.                             | 103.9 (3.0)           | n.r.              | n.r.                    | t=2.72,<br>p=0.011 <sup>a</sup>  | n.r.        | 0.96                          |
|                                    |                                                                                  | speed 3               | 106.8 (3.2)           | n.r.              | n.r.                             | 108.2 (4.6)           | n.r.              | n.r.                    | t=1.75,<br>p=0.107 <sup>a</sup>  | n.r.        | 0.62                          |
|                                    | 3-speed<br>walking test,<br>energy cost<br>of walking<br>[J/kg*m <sup>-1</sup> ] | speed 1               | 6.5 (2.6)             | n.r.              | n.r.                             | 6.2 (1.1)             | n.r.              | n.r.                    | z=2.04,<br>p=0.041 <sup>p</sup>  | n.r.        | N/A                           |
|                                    |                                                                                  | speed 2               | 4.6 (1.0)             | n.r.              | n.r.                             | 5.1 (0.5)             | n.r.              | n.r.                    | z=2.96,<br>p=0.003 <sup>p</sup>  | n.r.        | N/A                           |
|                                    |                                                                                  | speed 3               | 5.9 (0.9)             | n.r.              | n.r.                             | 6.2 (1.6)             | n.r.              | n.r.                    | z=1.47,<br>p=0.142 <sup>p</sup>  | n.r.        | N/A                           |
| Pitkälä et<br>al., 2013<br>[109]   | SPPB                                                                             | 9.7 (2.1)             | n.r.                  | n.r.              | IG1: 9.3 (2.4)<br>IG2: 9.8 (2.2) | n.r.                  | n.r.              | p=0.90 <sup>q</sup>     | n.r.                             | N/A         |                               |

**Table S3.** Data extraction first search (Continued)

| Reference                      | Motor assessments                       |                               | CG                 |                |                      | IG                                       |                                          |                      | Statistics / p-value                | Effect size        |                          |
|--------------------------------|-----------------------------------------|-------------------------------|--------------------|----------------|----------------------|------------------------------------------|------------------------------------------|----------------------|-------------------------------------|--------------------|--------------------------|
|                                |                                         |                               | Baseline Mean (SD) | Post Mean (SD) | Difference Mean (SD) | Baseline Mean (SD)                       | Post Mean (SD)                           | Difference Mean (SD) |                                     | reported           | calculated <sup>cc</sup> |
| Pomeroy et al., 1999 [125]     | Southampton Assessment of Mobility      |                               | 13.3 (6.0)         | 12.2 (6.4)     | -1.1 (4.1)           | 15.4 (4.1)                               | 15.1 (4.2)                               | -0.4 (2.2)           | p=0.614 <sup>b</sup>                | n.r.               | 0.22                     |
|                                | 2-min walk test [m]                     |                               | 23.8 (22.1)        | 24.4 (20.4)    | n.r.                 | 32.2 (15.7)                              | 35.3 (18.6)                              | 3.1 (9.3)            | p=0.325 <sup>a</sup>                | n.r.               | N/A                      |
| Roach et al., 2011 [105]       | Acute Care Index of Function            | transfer score                | 0.8 (0.2)          | 0.8 (0.3)      | n.r.                 | IG1: 0.8 (0.2)<br>IG2: 0.9 (0.2)         | IG1: 0.9 (0.2)<br>IG2: 0.8 (0.2)         | n.r.                 | p=0.04 <sup>i</sup>                 | n.r.               | N/A                      |
|                                |                                         | bed mobility score            | 0.9 (0.3)          | 0.8 (0.3)      | n.r.                 | IG1: 0.9 (0.2)<br>IG2: 0.8 (0.3)         | IG1: 0.9 (0.2)<br>IG2: 0.8 (0.3)         | n.r.                 | p=0.77 <sup>i</sup>                 | n.r.               | N/A                      |
|                                | 6min WT [ft]                            |                               | 296.6 (229.4)      | 324.8 (274.4)  | n.r.                 | IG1: 387.1 (214.8)<br>IG2: 329.9 (247.4) | IG1: 384.9 (217.6)<br>IG2: 367.5 (300.2) | n.r.                 | p=0.61 <sup>i</sup>                 | n.r.               | N/A                      |
| Rolland et al., 2007 [89]      | One-leg balance test [% abnormal score] |                               | (92.5%)            | (98.1%)        | n.r.                 | (91.0%)                                  | (94.6%)                                  | n.r.                 | p=0.34 <sup>r</sup>                 | n.r.               | N/A                      |
|                                | Get-Up and Go Test                      |                               | 2.7 (0.8)          | 3.2 (1.2)      | n.r.                 | 2.7 (0.8)                                | 3.1 (1.1)                                | n.r.                 | p=0.31 <sup>r</sup>                 | n.r.               | N/A                      |
|                                | 6m WT [m/s]                             |                               | 0.3 (0.1)          | 0.4 (0.2)      | n.r.                 | 0.3 (0.1)                                | 0.4 (0.2)                                | n.r.                 | p=0.002 <sup>r</sup>                | n.r.               | N/A                      |
| Santana-Sosa et al., 2008 [80] | POMA                                    |                               | n.r.               | n.r.           | n.r.                 | n.r.                                     | n.r.                                     | n.r.                 | F(1,14)=45.13, p<0.001 <sup>i</sup> | 0.887 <sup>z</sup> | 3.59                     |
|                                | Senior Fitness test                     | 30s CST                       | n.r.               | n.r.           | n.r.                 | n.r.                                     | n.r.                                     | n.r.                 | F(1,14)=48.74, p<0.001 <sup>i</sup> | 0.777 <sup>z</sup> | 3.73                     |
|                                |                                         | Arm curl test                 | n.r.               | n.r.           | n.r.                 | n.r.                                     | n.r.                                     | n.r.                 | F(1,14)=73.15, p<0.001 <sup>i</sup> | 0.839 <sup>z</sup> | N/A                      |
|                                |                                         | Chair sit-and-reach test [cm] | n.r.               | n.r.           | n.r.                 | n.r.                                     | n.r.                                     | n.r.                 | F(1,14)=40.18, p<0.001 <sup>i</sup> | 0.742 <sup>z</sup> | N/A                      |
|                                |                                         | Back scratch test [cm]        | n.r.               | n.r.           | n.r.                 | n.r.                                     | n.r.                                     | n.r.                 | F(1,14)=36.04, p<0.001 <sup>i</sup> | 0.720 <sup>z</sup> | N/A                      |

**Table S3.** Data extraction first search (*Continued*)

| Reference                               | Motor assessments                               |                           | CG                 |                |                      | IG                 |                |                      | Statistics / p-value                | Effect size        |                          |
|-----------------------------------------|-------------------------------------------------|---------------------------|--------------------|----------------|----------------------|--------------------|----------------|----------------------|-------------------------------------|--------------------|--------------------------|
|                                         |                                                 |                           | Baseline Mean (SD) | Post Mean (SD) | Difference Mean (SD) | Baseline Mean (SD) | Post Mean (SD) | Difference Mean (SD) |                                     | reported           | calculated <sup>cc</sup> |
| Santana-Sosa et al., 2008 [80]          | Senior Fitness test                             | 8-foot up-and-go test [s] | n.r.               | n.r.           | n.r.                 | n.r.               | n.r.           | n.r.                 | F(1,14)=36.78, p<0.001 <sup>i</sup> | 0.724 <sup>z</sup> | N/A                      |
|                                         |                                                 | 2-min step test           | n.r.               | n.r.           | n.r.                 | n.r.               | n.r.           | n.r.                 | F(1,14)=8.96, p=0.010 <sup>i</sup>  | 0.390 <sup>z</sup> | N/A                      |
| Schwenk et al., 2014 [94]               | Postural sway (inertial sensors) [sq cm]        |                           | 6.6 (0.8)          | 6.5 (0.8)      | n.r.                 | 6.5 (0.6)          | 6.1 (0.6)      | n.r.                 | p=0.023 <sup>i</sup>                | 0.06 <sup>z</sup>  | N/A                      |
|                                         | Gait analysis                                   | speed [cm/sec]            | 73.3 (37.1)        | 89.4 (36.8)    | n.r.                 | 72.7 (38.6)        | 92.8 (37.6)    | n.r.                 | p=0.354 <sup>i</sup>                | 0.01 <sup>z</sup>  | N/A                      |
|                                         |                                                 | stride length [cm]        | 80.9 (28.9)        | 91.2 (27.8)    | n.r.                 | 83.2 (31.0)        | 96.4 (29.9)    | n.r.                 | p=0.354 <sup>i</sup>                | 0.01 <sup>z</sup>  | N/A                      |
|                                         |                                                 | cadence [steps/min]       | 105.8 (22.0)       | 115.7 (19.8)   | n.r.                 | 100.6 (25.7)       | 113.5 (24.6)   | n.r.                 | p=0.343 <sup>i</sup>                | 0.01 <sup>z</sup>  | N/A                      |
|                                         | Hierarchical Assessment of Balance and Mobility |                           | 40.9 (13.6)        | 46.4 (13.0)    | n.r.                 | 38.5 (15.1)        | 46.6 (10.2)    | n.r.                 | p=0.162 <sup>i</sup>                | 0.02 <sup>z</sup>  | N/A                      |
|                                         | 5x STS [s]                                      |                           | 16.4 (6.8)         | 15.8 (10.9)    | n.r.                 | 17.0 (6.4)         | 13.1 (4.6)     | n.r.                 | p=0.037 <sup>i</sup>                | 0.06 <sup>z</sup>  | N/A                      |
|                                         | Handgrip dynamometer [kg]                       |                           | 14.6 (6.2)         | 15.1 (6.6)     | n.r.                 | 14.4 (6.2)         | 14.8 (6.7)     | n.r.                 | p=0.834 <sup>i</sup>                | 0.00 <sup>z</sup>  | N/A                      |
|                                         | One-repetition maximum in leg press [kg]        |                           | 97.0 (51.0)        | 102.2 (54.4)   | n.r.                 | 99.7 (59.4)        | 140.0 (70.2)   | n.r.                 | p<0.001 <sup>i</sup>                | 0.36 <sup>z</sup>  | N/A                      |
| One-repetition maximum of abductor [kg] |                                                 | 66.9 (28.8)               | 69.7 (29.0)        | n.r.           | 70.8 (34.9)          | 88.2 (36.8)        | n.r.           | p<0.001 <sup>i</sup> | 0.11 <sup>z</sup>                   | N/A                |                          |
| Schwenk et al., 2014 [95]               | Gait analysis                                   | speed [cm/sec]            | 128.7 (38.2)       | 127.6 (35.7)   | n.r.                 | 132.7 (55.7)       | 149.3 (48.2)   | n.r.                 | p<0.001 <sup>c</sup>                | 1.27 <sup>y</sup>  | N/A                      |
|                                         |                                                 | cadence [steps/min]       | 134.5 (17.9)       | 132.0 (19.2)   | n.r.                 | 137.1 (21.1)       | 145.4 (20.8)   | n.r.                 | p=0.002 <sup>c</sup>                | 0.96 <sup>y</sup>  | N/A                      |
|                                         |                                                 | stride length [cm]        | 115.3 (29.5)       | 115.9 (25.7)   | n.r.                 | 116.6 (42.6)       | 124.8 (37.4)   | n.r.                 | p=0.008 <sup>c</sup>                | 0.80 <sup>y</sup>  | N/A                      |

**Table S3.** Data extraction first search (*Continued*)

| Refer-<br>ence                   | Motor assessments                                                    |                                          | CG                    |                   |                         | IG                    |                   |                         | Statistics / p-<br>value | Effect size       |                               |
|----------------------------------|----------------------------------------------------------------------|------------------------------------------|-----------------------|-------------------|-------------------------|-----------------------|-------------------|-------------------------|--------------------------|-------------------|-------------------------------|
|                                  |                                                                      |                                          | Baseline<br>Mean (SD) | Post<br>Mean (SD) | Difference<br>Mean (SD) | Baseline<br>Mean (SD) | Post<br>Mean (SD) | Difference<br>Mean (SD) |                          | reported          | calcu-<br>lated <sup>cc</sup> |
| Schwenk<br>et al., 2014<br>[95]  | Gait<br>analysis                                                     | stride time<br>[sec]                     | 0.9 (0.1)             | 0.9 (0.1)         | n.r.                    | 0.9 (0.2)             | 0.8 (0.1)         | n.r.                    | p=0.001 <sup>c</sup>     | 0.99 <sup>y</sup> | N/A                           |
|                                  |                                                                      | double<br>support [%]                    | 25.9 (6.1)            | 25.4 (6.0)        | n.r.                    | 26.9 (8.9)            | 23.0 (7.8)        | n.r.                    | p=0.001 <sup>c</sup>     | 1.03 <sup>y</sup> | N/A                           |
|                                  |                                                                      | step width<br>[cm]                       | 10.2 (4.2)            | 9.9 (4.4)         | n.r.                    | 11.3 (4.2)            | 11.1 (5.0)        | n.r.                    | p=0.999 <sup>c</sup>     | 0.00 <sup>y</sup> | N/A                           |
|                                  |                                                                      | step time<br>variability<br>[CV]         | 5.0 (2.5)             | 5.4 (2.6)         | n.r.                    | 5.2 (3.4)             | 5.1 (2.1)         | n.r.                    | p=0.425 <sup>c</sup>     | 0.22 <sup>y</sup> | N/A                           |
|                                  |                                                                      | Walk-Ratio                               | 0.4 (0.1)             | 0.4 (0.1)         | n.r.                    | 0.4 (0.2)             | 0.4 (0.2)         | n.r.                    | p=0.554 <sup>c</sup>     | 0.18 <sup>y</sup> | N/A                           |
| Schwenk<br>et al., 2010<br>[126] | Gait<br>analysis,<br>dual task<br>cost, serial<br>2 condition<br>[%] | gait speed                               | -22.6 (18.4)          | -20.8 (15.8)      | n.r.                    | -21.9 (11.9)          | -13.5 (9.4)       | n.r.                    | p=0.086 <sup>i</sup>     | n.r.              | N/A                           |
|                                  |                                                                      | cadence                                  | -18.8 (15.4)          | -14.9 (12.5)      | n.r.                    | -17.5 (10.4)          | -12.8 (10.1)      | n.r.                    | p=0.846 <sup>i</sup>     | n.r.              | N/A                           |
|                                  |                                                                      | stride length                            | -5.7 (12.3)           | -6.8 (13.6)       | n.r.                    | -5.3 (9.2)            | -0.1 (8.2)        | n.r.                    | p=0.074 <sup>i</sup>     | n.r.              | N/A                           |
|                                  |                                                                      | stride time                              | 30.4 (45.8)           | 21.0 (23.0)       | n.r.                    | 24.1 (20.0)           | 16.8 (17.7)       | n.r.                    | p=0.750 <sup>i</sup>     | n.r.              | N/A                           |
|                                  |                                                                      | single<br>support                        | -6.0 (10.7)           | -6.2 (7.0)        | n.r.                    | -4.7 (6.4)            | -3.2 (4.2)        | n.r.                    | p=0.459 <sup>i</sup>     | n.r.              | N/A                           |
|                                  |                                                                      | motor +<br>cognitive<br>perfor-<br>mance | -14.7 (21.3)          | -13.6 (17.1)      | n.r.                    | -18.1 (15.2)          | -12.3 (7.8)       | n.r.                    | p=0.378 <sup>i</sup>     | n.r.              | N/A                           |
|                                  | Gait<br>analysis,<br>dual task<br>cost, serial<br>3 condition<br>[%] | gait speed                               | -39.8 (18.9)          | -37.2 (16.7)      | n.r.                    | -41.6 (18.4)          | -20.0 (12.7)      | n.r.                    | p<0.001 <sup>i</sup>     | n.r.              | N/A                           |
|                                  |                                                                      | cadence                                  | -26.8 (15.8)          | -23.6 (14.1)      | n.r.                    | -27.9 (18.5)          | -15.3 (11.0)      | n.r.                    | p=0.007 <sup>i</sup>     | n.r.              | N/A                           |
|                                  |                                                                      | stride length                            | -18.8 (14.0)          | -18.0 (15.6)      | n.r.                    | -20.7 (12.2)          | -5.6 (11.7)       | n.r.                    | p=0.001 <sup>i</sup>     | n.r.              | N/A                           |
|                                  |                                                                      | stride time                              | 44.0 (35.8)           | 35.8 (27.8)       | n.r.                    | 62.0 (102.0)          | 20.9 (20.7)       | n.r.                    | p=0.056 <sup>i</sup>     | n.r.              | N/A                           |
|                                  | single<br>support                                                    | -9.7 (11.3)                              | -10.6 (8.7)           | n.r.              | -13.8 (13.4)            | -5.1 (5.0)            | n.r.              | p=0.003 <sup>i</sup>    | n.r.                     | N/A               |                               |

**Table S3.** Data extraction first search (Continued)

| Reference                       | Motor assessments                                                  |                               | CG                 |                |                      | IG                 |                |                      | Statistics / p-value                 | Effect size |                          |
|---------------------------------|--------------------------------------------------------------------|-------------------------------|--------------------|----------------|----------------------|--------------------|----------------|----------------------|--------------------------------------|-------------|--------------------------|
|                                 |                                                                    |                               | Baseline Mean (SD) | Post Mean (SD) | Difference Mean (SD) | Baseline Mean (SD) | Post Mean (SD) | Difference Mean (SD) |                                      | reported    | calculated <sup>cc</sup> |
| Schwenk et al., 2010 [126]      | Gait analysis, dual task cost, serial 3 condition [%]              | motor + cognitive performance | -31.9 (20.3)       | -29.7 (17.5)   | n.r.                 | -32.7 (24.8)       | -12.1 (18.4)   | n.r.                 | p=0.026 <sup>i</sup>                 | n.r.        | N/A                      |
| Sobol et al., 2016 [84]         | TUG [s]                                                            |                               | 6.6 (1.62)         | 6.6 (1.9)      | n.r.                 | 6.7 (1.8)          | 6.5 (1.7)      | n.r.                 | p=0.151 <sup>s</sup>                 | n.r.        | N/A                      |
|                                 | 10-metre walk test [m/s]                                           | single task                   | 1.4 (0.3)          | 1.4 (0.2)      | n.r.                 | 1.3 (0.2)          | 1.3 (0.2)      | n.r.                 | p=0.108 <sup>s</sup>                 | n.r.        | N/A                      |
|                                 |                                                                    | dual task months              | 1.0 (0.3)          | 1.1 (0.3)      | n.r.                 | 0.9 (0.3)          | 1.0 (0.4)      | n.r.                 | p=0.051 <sup>s</sup>                 | n.r.        | N/A                      |
|                                 | 10-metre walk test [m/s]                                           | dual task numbers             | 1.1 (0.3)          | 1.1 (0.3)      | n.r.                 | 0.9 (0.3)          | 1.0 (0.4)      | n.r.                 | p=0.155 <sup>s</sup>                 | n.r.        | N/A                      |
|                                 | 30s CST                                                            |                               | 14.9 (4.2)         | 15.5 (4.3)     | n.r.                 | 13.9 (3.6)         | 14.3 (3.5)     | n.r.                 | p=0.408 <sup>s</sup>                 | n.r.        | N/A                      |
|                                 | 400-m walk test [s]                                                |                               | 305 (71.5)         | 303 (70.5)     | n.r.                 | 306 (92.3)         | 296 (79.1)     | n.r.                 | p=0.118 <sup>s</sup>                 | n.r.        | N/A                      |
|                                 | 6-min Astrand Cycle Ergometer test, VO <sub>2max</sub> [ml/kg/min] |                               | 26.2 (9.0)         | 27.2 (8.7)     | n.r.                 | 25.3 (7.5)         | 30.1 (7.5)     | n.r.                 | p<0.0001 <sup>s</sup>                | n.r.        | N/A                      |
| Souto Barreto et al., 2017 [90] | 4m WT [m/s]                                                        |                               | 0.5 (0.2)          | n.r.           | 0.03 (SE: 0.03)      | 0.5 (0.2)          | n.r.           | 0.07 (SE: 0.03)      | β=0.01, p=0.30 <sup>t</sup>          | n.r.        | 0.20                     |
|                                 | SPPB                                                               |                               | 4.5 (2.3)          | n.r.           | -0.8 (SE: 0.34)      | 4.4 (2.4)          | n.r.           | -0.2 (SE: 0.36)      | β=0.10, p=0.22 <sup>t</sup>          | n.r.        | 0.26                     |
| Steinberg et al., 2009 [98]     | 8-foot walk test [s]                                               |                               | 3.7 (1.6)          | n.r.           | n.r.                 | 3.6 (1.8)          | n.r.           | n.r.                 | β=-0.08 (0.27), p=0.77 <sup>u</sup>  | n.r.        | N/A                      |
|                                 | 5x STS [s]                                                         |                               | 16.1 (6.5)         | n.r.           | n.r.                 | 16.8 (7.4)         | n.r.           | n.r.                 | β=-4.4 (3.6), p=0.22 <sup>u</sup>    | n.r.        | N/A                      |
|                                 | Jebesen Total Time [s]                                             |                               | 107.3 (49.9)       | n.r.           | n.r.                 | 83.5 (41.9)        | n.r.           | n.r.                 | β=-23.39 (11.6), p=0.04 <sup>u</sup> | n.r.        | N/A                      |

**Table S3.** Data extraction first search (*Continued*)

| Refer-<br>ence                   | Motor assessments                                                |                                | CG                    |                   |                         | IG                    |                   |                         | Statistics / p-<br>value | Effect size |                               |
|----------------------------------|------------------------------------------------------------------|--------------------------------|-----------------------|-------------------|-------------------------|-----------------------|-------------------|-------------------------|--------------------------|-------------|-------------------------------|
|                                  |                                                                  |                                | Baseline<br>Mean (SD) | Post<br>Mean (SD) | Difference<br>Mean (SD) | Baseline<br>Mean (SD) | Post<br>Mean (SD) | Difference<br>Mean (SD) |                          | reported    | calcu-<br>lated <sup>cc</sup> |
| Suttanon<br>et al., 2013<br>[52] | Modified Clinical Test of Sensory Interaction of Balance [deg/s] |                                | 1.5 (0.7)             | 1.7 (0.8)         | n.r.                    | 1.9 (0.7)             | 1.8 (0.7)         | n.r.                    | p=0.086 <sup>s</sup>     | n.r.        | N/A                           |
|                                  | Limits of stability                                              | reaction time [ms]             | 1.1 (0.2)             | 1.2 (0.3)         | n.r.                    | 1.2 (0.3)             | 1.1 (0.2)         | n.r.                    | p=0.365 <sup>s</sup>     | n.r.        | N/A                           |
|                                  |                                                                  | Move-ment velocity [degrees/s] | 3.1 (1.2)             | 3.4 (1.0)         | n.r.                    | 3.0 (1.3)             | 3.0 (1.1)         | n.r.                    | p=0.016 <sup>s</sup>     | n.r.        | N/A                           |
|                                  |                                                                  | maximum excursion [%]          | 72.4 (12.0)           | 72.7 (12.1)       | n.r.                    | 66.3 (14.4)           | 68.3 (15.5)       | n.r.                    | p=0.817 <sup>s</sup>     | n.r.        | N/A                           |
|                                  | Limits of stability                                              | directional control [%]        | 64.4 (10.0)           | 61.3 (11.0)       | n.r.                    | 60.3 (12.3)           | 60.7 (11.3)       | n.r.                    | p=0.446 <sup>s</sup>     | n.r.        | N/A                           |
|                                  | FR [cm]                                                          |                                | 28.5 (4.7)            | 25.5 (5.3)        | n.r.                    | 23.5 (5.7)            | 25.8 (5.6)        | n.r.                    | p=0.002 <sup>s</sup>     | n.r.        | N/A                           |
|                                  | Hill Step Test                                                   |                                | 13.0 (3.2)            | 11.8 (3.5)        | n.r.                    | 12.3 (2.4)            | 12.3 (3.0)        | n.r.                    | p=.082 <sup>s</sup>      | n.r.        | N/A                           |
|                                  | Step quick turn, worse side                                      | time [s]                       | 3.3 (1.0)             | 3.1 (1.1)         | n.r.                    | 3.8 (1.7)             | 3.7 (2.0)         | n.r.                    | p=0.283 <sup>s</sup>     | n.r.        | N/A                           |
|                                  |                                                                  | sway [deg]                     | 48.9 (8.2)            | 47.3 (6.7)        | n.r.                    | 49.0 (11.1)           | 48.5 (13.0)       | n.r.                    | p=0.452 <sup>s</sup>     | n.r.        | N/A                           |
|                                  | TUG [s]                                                          |                                | 16.4 (6.6)            | 16.6 (6.2)        | n.r.                    | 16.2 (5.0)            | 16.2 (5.6)        | n.r.                    | p=0.571 <sup>s</sup>     | n.r.        | N/A                           |
|                                  | Cognitive TUG [s]                                                |                                | 18.1 (3.4)            | 19.2 (6.0)        | n.r.                    | 25.4 (8.0)            | 23.2 (7.7)        | n.r.                    | p=0.994 <sup>s</sup>     | n.r.        | N/A                           |
|                                  | Manual TUG [s]                                                   |                                | 18.0 (6.8)            | 19.0 (7.3)        | n.r.                    | 18.4 (5.8)            | 18.2 (6.6)        | n.r.                    | p=0.088 <sup>s</sup>     | n.r.        | N/A                           |
|                                  | Gait analysis                                                    | step width [cm]                | 15.6 (4.5)            | 16.2 (4.0)        | n.r.                    | 16.2 (2.3)            | 15.6 (2.5)        | n.r.                    | p=0.125 <sup>s</sup>     | n.r.        | N/A                           |
|                                  |                                                                  | step length [cm]               | 36.8 (13.2)           | 36.0 (9.5)        | n.r.                    | 32.5 (8.3)            | 31.8 (10.7)       | n.r.                    | p=0.907 <sup>s</sup>     | n.r.        | N/A                           |
|                                  |                                                                  | speed [cm/s]                   | 40.4 (13.5)           | 41.7 (14.3)       | n.r.                    | 39.4 (11.6)           | 38.9 (13.6)       | n.r.                    | p=0.244 <sup>s</sup>     | n.r.        | N/A                           |
| 5x STS [s]                       |                                                                  | 13.3 (5.0)                     | 13.3 (3.7)            | n.r.              | 13.2 (4.2)              | 14.6 (5.1)            | n.r.              | p=0.945 <sup>s</sup>    | n.r.                     | N/A         |                               |

**Table S3.** Data extraction first search (*Continued*)

| Reference                  | Motor assessments                                         |                               | CG                 |                |                      | IG                                       |                                          |                      | Statistics / p-value                                                                                                                       | Effect size         |                          |
|----------------------------|-----------------------------------------------------------|-------------------------------|--------------------|----------------|----------------------|------------------------------------------|------------------------------------------|----------------------|--------------------------------------------------------------------------------------------------------------------------------------------|---------------------|--------------------------|
|                            |                                                           |                               | Baseline Mean (SD) | Post Mean (SD) | Difference Mean (SD) | Baseline Mean (SD)                       | Post Mean (SD)                           | Difference Mean (SD) |                                                                                                                                            | reported            | calculated <sup>cc</sup> |
| Suttanon et al., 2013 [52] | STS on NeuroCom Balance Master                            | raising index [% body weight] | 16.3 (4.8)         | 17.0 (6.9)     | n.r.                 | 13.5 (4.7)                               | 14.5 (6.1)                               | n.r.                 | p=0.725 <sup>s</sup>                                                                                                                       | n.r.                | N/A                      |
|                            |                                                           | sway [deg/s]                  | 4.2 (1.3)          | 4.7 (1.5)      | n.r.                 | 4.0 (1.1)                                | 4.3 (1.1)                                | n.r.                 | p=0.290 <sup>s</sup>                                                                                                                       | n.r.                | N/A                      |
|                            | Physiological Profile Assessment [score]                  | 1.4 (1.2)                     | 1.8 (1.2)          | n.r.           | 1.8 (1.2)            | 1.9 (0.3)                                | n.r.                                     | p=0.314 <sup>s</sup> | n.r.                                                                                                                                       | N/A                 |                          |
| Tappen et al., 2000 [106]  | 6min WT [ft]                                              |                               | 261.1 (175.0)      | 212.1 (168.8)  | n.r.                 | IG1: 330.2 (250.0)<br>IG2: 391.7 (233.3) | IG1: 321.9 (223.2)<br>IG2: 310.6 (219.3) | n.r.                 | p<0.05 <sup>i</sup><br>CG: p=0.0874 <sup>e</sup><br>IG1: n.s. <sup>e</sup><br>IG2: p=0.0119 <sup>e</sup><br>F=5.59,<br>p<0.01 <sup>v</sup> | n.r.                | N/A                      |
| Telenius et al., 2015 [71] | BBS [score]                                               |                               | 35.4 (13.7)        | 36.6 (14.4)    | n.r.                 | 34.3 (14.5)                              | 37.2 (14.0)                              | n.r.                 | p=0.02 <sup>a</sup>                                                                                                                        | 0.4 <sup>y</sup>    | N/A                      |
|                            | 6m WT [m/s]                                               |                               | 0.5 (0.2)          | 0.5 (0.3)      | n.r.                 | 0.5 (0.2)                                | 0.5 (0.2)                                | n.r.                 | p=0.86 <sup>a</sup>                                                                                                                        | 0.0 <sup>y</sup>    | N/A                      |
|                            | 30s CST                                                   |                               | 6.2 (2.9)          | 6.6 (3.7)      | n.r.                 | 6.0 (3.1)                                | 7 (3.3)                                  | n.r.                 | p=0.11 <sup>a</sup>                                                                                                                        | 0.2 <sup>y</sup>    | N/A                      |
| Toots et al., 2017 [91]    | 4m WT [m/s]                                               | walking aid                   | 0.5 (0.2)          | n.r.           | -0.02 (SE: 0.02)     | 0.5 (0.2)                                | n.r.                                     | -0.02 (SE: 0.02)     | p=0.777 <sup>w</sup>                                                                                                                       | -0.05 <sup>bb</sup> | 0.05                     |
|                            |                                                           | no walking aid                | 0.5 (0.2)          | n.r.           | -0.02 (SE: 0.02)     | 0.4 (0.2)                                | n.r.                                     | 0.01 (SE: 0.02)      | p=0.242 <sup>w</sup>                                                                                                                       | 0.20 <sup>bb</sup>  | 0.20                     |
| Toots et al., 2016 [72]    | BBS                                                       |                               | 29.3 (14.7)        | n.r.           | -1.8 (SE: 0.9)       | 28.6 (14.3)                              | n.r.                                     | 2.4 (SE: 0.9)        | p<0.001 <sup>w</sup>                                                                                                                       | 0.52 <sup>bb</sup>  | 0.53                     |
| Toulotte et al., 2003 [85] | Postural sway (posturography platform) [mm <sup>2</sup> ] |                               | 292.3 (94.5)       | n.r.           | n.r.                 | 398.7 (229.6)                            | n.r.                                     | n.r.                 | p<0.01 <sup>i</sup>                                                                                                                        | n.r.                | N/A                      |
|                            | TUG [s]                                                   |                               | 39.4 (17.7)        | n.r.           | n.r.                 | 67.6 (38.9)                              | n.r.                                     | n.r.                 | p<0.01 <sup>i</sup>                                                                                                                        | n.r.                | N/A                      |
|                            | 10-metre walk test [s]                                    |                               | 63.4 (51.1)        | n.r.           | n.r.                 | 60.6 (49.9)                              | n.r.                                     | n.r.                 | p<0.05 <sup>i</sup>                                                                                                                        | n.r.                | N/A                      |



**Table S3.** Data extraction first search (*Continued*)

| Refer-<br>ence                | Motor assessments                               |                                               | CG                    |                   |                         | IG                    |                   |                         | Statistics / p-<br>value | Effect size        |                               |
|-------------------------------|-------------------------------------------------|-----------------------------------------------|-----------------------|-------------------|-------------------------|-----------------------|-------------------|-------------------------|--------------------------|--------------------|-------------------------------|
|                               |                                                 |                                               | Baseline<br>Mean (SD) | Post<br>Mean (SD) | Difference<br>Mean (SD) | Baseline<br>Mean (SD) | Post<br>Mean (SD) | Difference<br>Mean (SD) |                          | reported           | calcu-<br>lated <sup>cc</sup> |
| Toulotte et al., 2003 [85]    | Chair sit-and-reach test [cm]                   |                                               | 10.3 (8.0)            | n.r.              | n.r.                    | 11.4 (7.1)            | n.r.              | n.r.                    | p<0.05 <sup>i</sup>      | n.r.               | N/A                           |
| Venturelli et al., 2011 [107] | 6min WT [m]                                     |                                               | 238 (47)              | 168 (34)          | n.r.                    | 245 (31)              | 294 (49)          | n.r.                    | p<0.001 <sup>i</sup>     | n.r.               | N/A                           |
| Vreugdenhil et al., 2012 [59] | FR [cm]                                         |                                               | 24.0 (6.4)            | 22.1 (7.9)        | -1.9 (SE: 1.3)          | 27.6 (7.4)            | 30.6 (7.0)        | 2.3 (SE: 1.1)           | p=0.032 <sup>s</sup>     | n.r.               | 0.80                          |
|                               | TUG [s]                                         |                                               | 11.1 (3.3)            | 12.8 (4.1)        | 2.0 (SE: 0.7)           | 9.7 (3.7)             | 9.1 (3.8)         | -0.9 (SE: 0.5)          | p=0.004 <sup>s</sup>     | n.r.               | 1.09                          |
|                               | 10-s chair-stand test                           |                                               | 8.5 (2.9)             | 7.2 (3.2)         | -1.0 (SE: 0.4)          | 9.2 (2.5)             | 10.8 (2.0)        | 1.7 (SE: 0.4)           | p<0.001 <sup>s</sup>     | n.r.               | 1.55                          |
| Werner et al., 2017 [100]     | Body-fixed-sensor-based STS analysis (DynaPort) | trunk flexion, range [°]                      | 33.1 (9.9)            | 34.9 (10.5)       | 0.9 (9.0)               | 33.6 (7.5)            | 40.2 (12.8)       | 8.3 (13.4)              | p=0.006 <sup>i</sup>     | 0.099 <sup>z</sup> | 0.66                          |
|                               |                                                 | trunk flexion, duration [s]                   | 1.1 (0.5)             | 1.1 (0.5)         | -0.1 (0.6)              | 1.2 (0.9)             | 1.8 (1.1)         | 0.8 (1.2)               | p<0.001 <sup>i</sup>     | 0.188 <sup>z</sup> | 0.96                          |
|                               |                                                 | maximum trunk flexion, angular velocity [°/s] | 73.9 (26.6)           | 81.4 (26.8)       | 5.9 (22.0)              | 79.0 (27.4)           | 64.8 (27.1)       | -12.3 (26.4)            | p=0.002 <sup>i</sup>     | 0.127 <sup>z</sup> | 0.76                          |
|                               |                                                 | STS movement duration [s]                     | 2.1 (0.9)             | 2.0 (0.7)         | -0.1 (0.9)              | 2.1 (1.1)             | 2.8 (1.4)         | 0.9 (1.5)               | p<0.001 <sup>i</sup>     | 0.158 <sup>z</sup> | 0.87                          |
|                               | ACSID                                           | recall and initiation score                   | 1.8 (1.0)             | 1.7 (.9)          | -0.1 (0.9)              | 1.8 (1.0)             | 3.3 (1.3)         | 1.7 (1.7)               | p<0.001 <sup>i</sup>     | 0.319 <sup>z</sup> | 1.35                          |

**Table S3.** Data extraction first search (*Continued*)

| Reference                 | Motor assessments                            |                                  | CG                 |                 |                      | IG                 |                 |                      | Statistics / p-value | Effect size         |                          |
|---------------------------|----------------------------------------------|----------------------------------|--------------------|-----------------|----------------------|--------------------|-----------------|----------------------|----------------------|---------------------|--------------------------|
|                           |                                              |                                  | Baseline Mean (SD) | Post Mean (SD)  | Difference Mean (SD) | Baseline Mean (SD) | Post Mean (SD)  | Difference Mean (SD) |                      | reported            | calculated <sup>cc</sup> |
| Werner et al., 2017 [100] | ACSID                                        | effective performance score      | 1.9 (.9)           | 1.8 (.8)        | -0.1 (0.9)           | 2.1 (.9)           | 3.1 (1.0)       | 1.0 (0.9)            | p<0.001 <sup>i</sup> | 0.261 <sup>z</sup>  | 1.24                     |
|                           |                                              | total score                      | 3.7 (1.4)          | 3.5 (1.5)       | -0.1 (1.4)           | 3.9 (1.4)          | 6.4 (2.1)       | 2.7 (2.2)            | p<0.001 <sup>i</sup> | 0.372 <sup>z</sup>  | 1.54                     |
| Wesson et al., 2013 [61]  | Near-tandem test [n.r.]                      | Hill Step Test                   | 5.7 (3.0)          | 6.3 (3.7)       | n.r.                 | 5.2 (3.6)          | 5.4 (3.7)       | n.r.                 | p=0.32 <sup>b</sup>  | n.r.                | N/A                      |
|                           |                                              | Physiological Profile Assessment | 14.5 (5.0)         | 14.2 (7.7)      | n.r.                 | 19.2 (6.5)         | 15.0 (5.1)      | n.r.                 | p=0.1 <sup>b</sup>   | n.r.                | N/A                      |
|                           |                                              | Physiological Profile Assessment | 1.7 (1.7)          | 2.7 (1.8)       | n.r.                 | 0.8 (1.2)          | 1.4 (1.6)       | n.r.                 | p=0.82 <sup>b</sup>  | n.r.                | N/A                      |
| Wilothe et al., 2018 [54] | Physiomat-Follow-The-Ball Task, trained      | duration [s]                     | 28.9 (15.7)        | 23.4 (5.5)      | n.r.                 | 30.9 (17.5)        | 19.3 (4.6)      | n.r.                 | p<0.001 <sup>c</sup> | 0.253 <sup>aa</sup> | N/A                      |
|                           |                                              | accuracy [digits/ms]             | 4164.3 (3922.4)    | 3776.3 (1286.9) | n.r.                 | 4450.4 (2859.8)    | 3169.7 (557.2)  | n.r.                 | p<0.001 <sup>c</sup> | 0.144 <sup>aa</sup> | N/A                      |
|                           | Physiomat-Trail-Making Task, Level 1 trained | duration [s]                     | 11.5 (4.7)         | 9.7 (3.1)       | n.r.                 | 16.7 (20.3)        | 7.2 (1.9)       | n.r.                 | p<0.001 <sup>c</sup> | 0.260 <sup>aa</sup> | N/A                      |
|                           |                                              | accuracy [digits/ms]             | 2108.1 (911.9)     | 2124.9 (773.9)  | n.r.                 | 2849.1 (4199.2)    | 1782.0 (339.7)  | n.r.                 | p=0.007 <sup>c</sup> | 0.092 <sup>aa</sup> | N/A                      |
|                           | Physiomat-Trail-Making Task, Level 2 trained | duration [s]                     | 19.9 (11.5)        | 16.7 (4.9)      | n.r.                 | 21.8 (9.7)         | 14.3 (5.6)      | n.r.                 | p<0.001 <sup>c</sup> | 0.311 <sup>aa</sup> | N/A                      |
|                           |                                              | accuracy [digits/ms]             | 3005.7 (1066.2)    | 3187.0 (940.1)  | n.r.                 | 3390.1 (1800.1)    | 2923.1 (803.0)  | n.r.                 | p=0.003 <sup>c</sup> | 0.127 <sup>aa</sup> | N/A                      |
|                           | Physiomat-Trail-Making Task, Level 3 trained | duration [s]                     | 25.9 (10.4)        | 22.7 (5.3)      | n.r.                 | 28.6 (11.8)        | 20.0 (7.4)      | n.r.                 | p<0.001 <sup>c</sup> | 0.293 <sup>aa</sup> | N/A                      |
|                           |                                              | accuracy [digits/ms]             | 3742.8 (557.8)     | 3992.0 (945.8)  | n.r.                 | 4376.7 (1528.5)    | 3806.1 (1246.3) | n.r.                 | p=0.047 <sup>c</sup> | 0.065 <sup>aa</sup> | N/A                      |
|                           | Physiomat-Trail-Making Task, Level 4 trained | duration [s]                     | 43.9 (9.0)         | 44.0 (15.5)     | n.r.                 | 51.3 (16.6)        | 34.9 (7.9)      | n.r.                 | p<0.001 <sup>c</sup> | 0.340 <sup>aa</sup> | N/A                      |
|                           |                                              | accuracy [digits/ms]             | 7724.4 (1676.4)    | 7880.0 (2238.8) | n.r.                 | 8176.3 (2484.2)    | 6599.3 (1468.6) | n.r.                 | p<0.001 <sup>c</sup> | 0.365 <sup>aa</sup> | N/A                      |

**Table S3.** Data extraction first search (*Continued*)

| Refer-<br>ence                 | Motor assessments                                        |                         | CG                    |                    |                         | IG                    |                   |                         | Statistics / p-<br>value | Effect size         |                               |
|--------------------------------|----------------------------------------------------------|-------------------------|-----------------------|--------------------|-------------------------|-----------------------|-------------------|-------------------------|--------------------------|---------------------|-------------------------------|
|                                |                                                          |                         | Baseline<br>Mean (SD) | Post<br>Mean (SD)  | Difference<br>Mean (SD) | Baseline<br>Mean (SD) | Post<br>Mean (SD) | Difference<br>Mean (SD) |                          | reported            | calcu-<br>lated <sup>cc</sup> |
| Wiloth et<br>al., 2018<br>[54] | Physiomat-<br>Trail-Making<br>Task, Level<br>5 trained   | duration [s]            | 58.7 (17.6)           | 56.2 (16.7)        | n.r.                    | 56.3 (12.1)           | 48.7 (14.7)       | n.r.                    | p<0.001 <sup>c</sup>     | 0.589 <sup>aa</sup> | N/A                           |
|                                |                                                          | accuracy<br>[digits/ms] | 8467.8<br>(1646.8)    | 9360.2<br>(2855.1) | n.r.                    | 8444.3 (2261.5)       | 8005.0 (1906.4)   | n.r.                    | p=0.007 <sup>c</sup>     | 0.329 <sup>aa</sup> | N/A                           |
|                                | Physiomat-Trail-Making<br>Task score, trained            |                         | 3.2 (1.5)             | 3.6 (1.4)          | n.r.                    | 3.4 (1.4)             | 4.7 (.9)          | n.r.                    | p<0.001 <sup>c</sup>     | 0.211 <sup>aa</sup> | N/A                           |
|                                | Physiomat-<br>Trail-Making<br>Task, Level<br>1 untrained | duration [s]            | 11.2 (5.4)            | 9.7 (3.1)          | n.r.                    | 15.6 (15.6)           | 7.5 (2.1)         | n.r.                    | p<0.001 <sup>c</sup>     | 0.219 <sup>aa</sup> | N/A                           |
|                                |                                                          | accuracy<br>[digits/ms] | 2043.6<br>(1246.8)    | 1959.8<br>(543.6)  | n.r.                    | 2523.1 (3040.6)       | 1735.4 (317.1)    | n.r.                    | p=0.017 <sup>c</sup>     | 0.073 <sup>aa</sup> | N/A                           |
|                                | Physiomat-<br>Trail-Making<br>Task, Level<br>2 untrained | duration [s]            | 17.9 (8.4)            | 14.7 (3.7)         | n.r.                    | 18.0 (7.4)            | 13.9 (9.9)        | n.r.                    | p<0.001 <sup>c</sup>     | 0.236 <sup>aa</sup> | N/A                           |
|                                |                                                          | accuracy<br>[digits/ms] | 2770.9<br>(1598.6)    | 2661.6<br>(785.8)  | n.r.                    | 2703.4 (1586.1)       | 2683.1 (1746.5)   | n.r.                    | p=0.121 <sup>c</sup>     | 0.037 <sup>aa</sup> | N/A                           |
|                                | Physiomat-<br>Trail-Making<br>Task, Level<br>3 untrained | duration [s]            | 29.6 (15.9)           | 25.4 (7.0)         | n.r.                    | 32.9 (16.5)           | 23.1 (10.9)       | n.r.                    | p<0.001 <sup>c</sup>     | 0.204 <sup>aa</sup> | N/A                           |
|                                |                                                          | accuracy<br>[digits/ms] | 4467.0<br>(1093.5)    | 4816.0<br>(1671.0) | n.r.                    | 5316.9 (2637.1)       | 4539.6 (2924.3)   | n.r.                    | p=0.008 <sup>c</sup>     | 0.122 <sup>aa</sup> | N/A                           |
|                                | Physiomat-<br>Trail-Making<br>Task, Level<br>4 untrained | duration [s]            | 41.4 (9.5)            | 38.7 (12.2)        | n.r.                    | 38.7 (11.8)           | 33.0 (7.7)        | n.r.                    | p=0.005 <sup>c</sup>     | 0.280 <sup>aa</sup> | N/A                           |
|                                |                                                          | accuracy<br>[digits/ms] | 8137.4<br>(2374.7)    | 7671.3<br>(3642.1) | n.r.                    | 7285.2 (2346.8)       | 5857.7 (1296.5)   | n.r.                    | p=0.009 <sup>c</sup>     | 0.244 <sup>aa</sup> | N/A                           |
|                                | Physiomat-<br>Trail-Making<br>Task, Level<br>5 untrained | duration [s]            | 55.5 (11.8)           | 54.5 (15.1)        | n.r.                    | 55.7 (16.5)           | 48.5 (13.7)       | n.r.                    | p=0.003 <sup>c</sup>     | 0.384 <sup>aa</sup> | N/A                           |
|                                |                                                          | accuracy<br>[digits/ms] | 8598.2<br>(1539.8)    | 9027.3<br>(2444.4) | n.r.                    | 9227.8 (4138.9)       | 8278.5 (2000.1)   | n.r.                    | p=0.001 <sup>c</sup>     | 0.459 <sup>aa</sup> | N/A                           |
|                                | Physiomat-Trail-Making<br>Task score, untrained          |                         | 3.0 (1.5)             | 3.5 (1.4)          | n.r.                    | 3.1 (1.4)             | 4.5 (1.0)         | n.r.                    | p<0.001 <sup>c</sup>     | 0.184 <sup>aa</sup> | N/A                           |

**Table S3.** Data extraction first search (Continued)

| Reference             | Motor assessments                              |                                     | CG                 |                |                      | IG                 |                |                                                     | Statistics / p-value                           | Effect size |                          |
|-----------------------|------------------------------------------------|-------------------------------------|--------------------|----------------|----------------------|--------------------|----------------|-----------------------------------------------------|------------------------------------------------|-------------|--------------------------|
|                       |                                                |                                     | Baseline Mean (SD) | Post Mean (SD) | Difference Mean (SD) | Baseline Mean (SD) | Post Mean (SD) | Difference Mean (SD)                                |                                                | reported    | calculated <sup>cc</sup> |
| Yoon et al, 2013 [73] | Postural sway (Wii Balance Board), eyes closed | wide base, COP velocity [cm/s]      | 3.5 (1.7)          | 3.2 (1.3)      | 0.8 (1.8)            | 4.8 (1.4)          | 3.6 (1.2)      | 1.2 (1.0)                                           | p<0.05 <sup>b</sup><br>IG: p<0.05 <sup>x</sup> | n.r.        | 0.30                     |
|                       |                                                | narrow base, COP path length [cm/s] | 104.7 (46.6)       | 95.4 (37.5)    | 9.3 (14.1)           | 146.4 (64.5)       | 93.9 (38.9)    | 52.5 (59.7)                                         | p<0.05 <sup>b</sup><br>IG: p<0.05 <sup>x</sup> | n.r.        | 1.00                     |
|                       | BBS                                            | 34.9 (4.6)                          | 35.1 (4.4)         | -0.2 (2.4)     | 35.3 (1.8)           | 38.0 (2.0)         | -2.7 (0.9)     | p<0.05 <sup>b</sup><br>CG / IG: p<0.05 <sup>x</sup> | n.r.                                           | 1.52        |                          |
|                       | TUG [s]                                        | 28.8 (5.7)                          | n.r.               | n.r.           | 27.7 (6.1)           | n.r.               | n.r.           | n.r.                                                | n.r.                                           | N/A         |                          |

4m WT: 4-metre walk test, 5x STS: Five Times Sit-to-Stand Test, 6m WT: 6-metre walk test, 6min WT: 6-minute walk test, 30s CST: 30-second chair stand test, ACSID: Assessment of Compensatory Sit-to-Stand Maneuvers in People With Dementia, BBS: Berg Balance Scale, bpm: beats per minute, CG: control group, COP: centre of pressure, E-ADL Test: Erlangen Test of Activities of Daily Living, FICSIT-4: Frailty and Injuries: Cooperative Studies of Intervention Techniques - substest 4, FR: Functional Reach Test, GMWT: Groningen Meander Walking Test, IG: intervention group, N/A: not applicable, n.s.: not significant, POMA: Performance Oriented Mobility Assessment, SD: standard deviation, SE: standard error, SPPB: Short Physical Performance Battery, STS: Sit-to-Stand, TUG: Timed Up & Go Test, VO<sub>2</sub>(max): (maximum) oxygen uptake

<sup>a</sup> independent t-test, between-group baseline-post difference, <sup>b</sup> Mann-Whitney test, between-group baseline-post difference, <sup>c</sup> Analysis of covariance with baseline scores as covariates, between-group post difference, <sup>d</sup> Kruskal-Wallis tests, between-group baseline-post difference, <sup>e</sup> dependent t-test, within-group baseline-post difference, <sup>f</sup> independent t-test, between-group post difference, <sup>g</sup> mixed model analysis of covariance with repeated measures, <sup>h</sup> general linear model analysis of covariance with repeated-measures, <sup>i</sup> two-way analysis of variance with repeated measures, group\*time interaction, <sup>j</sup> one-way analysis of variance, between-group post difference, <sup>k</sup> linear regression analyses, between-group baseline-post difference, <sup>l</sup> Tukey test, within-group baseline-post difference, <sup>m</sup> one-way analysis of variance/analysis of variance with repeated measures, within-group baseline-post difference, <sup>n</sup> Friedman analysis of variance, within-group baseline-post difference, <sup>o</sup> mixed design multivariate analysis of variance, group\*time interaction, <sup>p</sup> Wilcoxon's test, between-group baseline-post difference, <sup>q</sup> Analysis of covariance with age, sex, and use of mobility devices, between-group baseline-post difference, <sup>r</sup> ?, between-group baseline-post difference, <sup>s</sup> general linear model analysis, between-group baseline-post difference, <sup>t</sup> three level regression model, between-group baseline-post difference, <sup>u</sup> linear random effects models, time\*group interaction, <sup>v</sup> Analysis of covariance with baseline scores and treatment fidelity as covariates, between-group post difference, <sup>w</sup> linear mixed effects models between-group baseline-post difference, <sup>x</sup> Wilcoxon's signed-rank test, within-group baseline-post difference, <sup>y</sup> standardized mean difference/Cohen's d, between-group, <sup>z</sup> partial eta squared, time\*group interaction effect, <sup>aa</sup> partial eta squared, group effect, <sup>bb</sup> between-group difference/unadjusted pooled standard deviation of baseline-post difference, <sup>cc</sup> Cohen's d, time\*group interaction

\* Intention-to-treat analysis and complete-case analysis

## References

50. Bossers WJR, van der Woude LHV, Boersma F, Hortobágyi T, Scherder EJA, van Heuvelen MJG. A 9-Week Aerobic and Strength Training Program Improves Cognitive and Motor Function in Patients with Dementia: A Randomized, Controlled Trial. *Am J Geriatr Psychiatry*. 2015;23:1106–16. doi:10.1016/j.jagp.2014.12.191.
52. Suttanon P, Hill KD, Said CM, Williams SB, Byrne KN, LoGiudice D, et al. Feasibility, safety and preliminary evidence of the effectiveness of a home-based exercise programme for older people with Alzheimer's disease: A pilot randomized controlled trial. *Clin Rehabil*. 2013;27:427–38. doi:10.1177/0269215512460877.
54. Wiloth S, Werner C, Lemke NC, Bauer J, Hauer K. Motor-cognitive effects of a computerized game-based training method in people with dementia: A randomized controlled trial. *Aging Ment Health*. 2018;22:1124–35. doi:10.1080/13607863.2017.1348472.
56. Arcoverde C, Deslandes A, Moraes H, Almeida C, Araujo NBd, Vasques PE, et al. Treadmill training as an augmentation treatment for Alzheimer's disease: A pilot randomized controlled study. *Arq Neuropsiquiatr*. 2014;72:190–6. doi:10.1590/0004-282X20130231.
57. Miu D, Szeto S, Mak Y. A randomized controlled trial on the effect of exercise on physical, cognitive, and affective function in dementia subjects. *Asian J Gerontol Geriatr*. 2008;3:8–16.
58. Netz Y, Axelrad S, Argov E. Group physical activity for demented older adults feasibility and effectiveness. *Clin Rehabil*. 2007;21:977–86. doi:10.1177/0269215507078318.
59. Vreugdenhil A, Cannell J, Davies A, Razay G. A community-based exercise programme to improve functional ability in people with Alzheimer's disease: A randomized controlled trial. *Scand J Caring Sci*. 2012;26:12–9. doi:10.1111/j.1471-6712.2011.00895.x.
61. Wesson J, Clemson L, Brodaty H, Lord S, Taylor M, Gitlin L, Close J. A feasibility study and pilot randomised trial of a tailored prevention program to reduce falls in older people with mild dementia. *BMC Geriatr*. 2013;13:89. doi:10.1186/1471-2318-13-89.
65. Burgener SC, Yang Y, Gilbert R, Marsh-Yant S. The effects of a multimodal intervention on outcomes of persons with early-stage dementia. *Am. J. Alzheimers Dis. Other Dement*. 2008;23:382–94. doi:10.1177/1533317508317527.
66. Christofoletti G, Oliani MM, Gobbi S, Stella F, Bucken Gobbi LT, Renato Canineu P. A controlled clinical trial on the effects of motor intervention on balance and cognition in institutionalized elderly patients with dementia. *Clin Rehabil*. 2008;22:618–26. doi:10.1177/0269215507086239.
67. Kim M-J, Han C-W, Min K-Y, Cho C-Y, Lee C-W, Ogawa Y, et al. Physical Exercise with Multicomponent Cognitive Intervention for Older Adults with Alzheimer's Disease: A 6-Month Randomized Controlled Trial. *Dement Geriatr Cogn Dis Extra*. 2016;6:222–32. doi:10.1159/000446508.
68. Lam FMH, Liao LR, Kwok TCY, Pang MYC. Effects of adding whole-body vibration to routine day activity program on physical functioning in elderly with mild or moderate dementia: A randomized controlled trial. *Int J Geriatr Psychiatry*. 2018;33:21–30. doi:10.1002/gps.4662.
69. Padala KP, Padala PR, Lensing SY, Dennis RA, Bopp MM, Roberson PK, Sullivan DH. Home-Based Exercise Program Improves Balance and Fear of Falling in Community-Dwelling Older Adults with Mild Alzheimer's Disease: A Pilot Study. *J Alzheimers Dis*. 2017;59:565–74. doi:10.3233/JAD-170120.
70. Padala KP, Padala PR, Malloy TR, Geske JA, Dubbert PM, Dennis RA, et al. Wii-fit for improving gait and balance in an assisted living facility: A pilot study. *J Aging Res*. 2012;2012:597573. doi:10.1155/2012/597573.
71. Telenius EW, Engedal K, Bergland A. Effect of a high-intensity exercise program on physical function and mental health in nursing home residents with dementia: An assessor blinded randomized controlled trial. *PLoS One*. 2015;10:e0126102. doi:10.1371/journal.pone.0126102.
72. Toots A, Littbrand H, Lindelöf N, Wiklund R, Holmberg H, Nordström P, et al. Effects of a High-Intensity Functional Exercise Program on Dependence in Activities of Daily Living and Balance in Older Adults with Dementia. *J Am Geriatr Soc*. 2016;64:55–64. doi:10.1111/jgs.13880.

73. Yoon JE, Lee SM, Lim HS, Kim TH, Jeon JK, Mun MH. The effects of cognitive activity combined with active extremity exercise on balance, walking activity, memory level and quality of life of an older adult sample with dementia. *J. Phys. Ther. Sci.* 2013;25:1601–4. doi:10.1589/jpts.25.1601.
74. Dawson N, Judge KS, Gerhart H. Improved Functional Performance in Individuals With Dementia After a Moderate-Intensity Home-Based Exercise Program: A Randomized Controlled Trial. *J Geriatr Phys Ther.* 2019;42:18–27. doi:10.1519/JPT.000000000000128.
76. Francese T, Sorrell J, Butler FR. The effects of regular exercise on muscle strength and functional abilities of late stage Alzheimer's residents. *Am J Alzheimers Dis Other Demen.* 1997;12:122–7. doi:10.1177/153331759701200305.
77. Hauer K, Ullrich P, Dutzi I, Beurskens R, Kern S, Bauer J, Schwenk M. Effects of Standardized Home Training in Patients with Cognitive Impairment following Geriatric Rehabilitation: A Randomized Controlled Pilot Study. *Gerontology.* 2017;63:495–506. doi:10.1159/000478263.
78. Hauer K, Schwenk M, Zieschang T, Essig M, Becker C, Oster P. Physical training improves motor performance in people with dementia: A randomized controlled trial. *J Am Geriatr Soc.* 2012;60:8–15. doi:10.1111/j.1532-5415.2011.03778.x.
79. Kovács E, Sztruhár Jónásné I, Karóczy CK, Korpos A, Gondos T. Effects of a multimodal exercise program on balance, functional mobility and fall risk in older adults with cognitive impairment: A randomized controlled single-blind study. *Eur J Phys Rehabil Med.* 2013;49:639–48.
80. Santana-Sosa E, Barriopedro MI, López-Mojares LM, Pérez M, Lucia A. Exercise training is beneficial for Alzheimer's patients. *Int J Sports Med.* 2008;29:845–50. doi:10.1055/s-2008-1038432.
82. Cancela JM, Ayán C, Varela S, Seijo M. Effects of a long-term aerobic exercise intervention on institutionalized patients with dementia. *J Sci Med Sport.* 2016;19:293–8. doi:10.1016/j.jsams.2015.05.007.
83. Kampragkou C, Iakovidis P, Kampragkou E, Kellis E. Effects of a 12-Week Aerobic Exercise Program Combined with Music Therapy and Memory Exercises on Cognitive and Functional Ability in People with Middle Type of Alzheimer's Disease. *International Journal of Physiotherapy* 2017. doi:10.15621/ijphy/2017/v4i5/159420.
84. Sobol NA, Hoffmann K, Frederiksen KS, Vogel A, Vestergaard K, Brændgaard H, et al. Effect of aerobic exercise on physical performance in patients with Alzheimer's disease. *Alzheimers Dement.* 2016;12:1207–15. doi:10.1016/j.jalz.2016.05.004.
85. Toulotte C, Fabre C, Dangremont B, Lensele G, Thévenon A. Effects of physical training on the physical capacity of frail, demented patients with a history of falling: A randomised controlled trial. *Age Ageing.* 2003;32:67–73. doi:10.1093/ageing/32.1.67.
86. Aguiar P, Monteiro L, Feres A, Gomes I, Melo A. Rivastigmine transdermal patch and physical exercises for Alzheimer's disease: A randomized clinical trial. *Curr Alzheimer Res.* 2014;11:532–7. doi:10.2174/1567205011666140618102224.
89. Rolland Y, Pillard F, Klapouszczak A, Reynish E, Thomas D, Andrieu S, et al. Exercise program for nursing home residents with Alzheimer's disease: A 1-year randomized, controlled trial. *J Am Geriatr Soc.* 2007;55:158–65. doi:10.1111/j.1532-5415.2007.01035.x.
90. Souto Barreto P de, Cesari M, Denormandie P, Armaingaud D, Vellas B, Rolland Y. Exercise or Social Intervention for Nursing Home Residents with Dementia: A Pilot Randomized, Controlled Trial. *J Am Geriatr Soc.* 2017;65:E123-E129. doi:10.1111/jgs.14947.
91. Toots A, Littbrand H, Holmberg H, Nordström P, Lundin-Olsson L, Gustafson Y, Rosendahl E. Walking Aids Moderate Exercise Effects on Gait Speed in People With Dementia: A Randomized Controlled Trial. *J Am Med Dir Assoc.* 2017;18:227–33. doi:10.1016/j.jamda.2016.09.003.
93. Pedrinolla A, Venturelli M, Fonte C, Munari D, Benetti MV, Rudi D, et al. Exercise Training on Locomotion in Patients with Alzheimer's Disease: A Feasibility Study. *J Alzheimers Dis.* 2018;61:1599–609. doi:10.3233/JAD-170625.
94. Schwenk M, Dutzi I, Englert S, Micol W, Najafi B, Mohler J, Hauer K. An intensive exercise program improves motor performances in patients with dementia: Translational model of geriatric rehabilitation. *J Alzheimers Dis.* 2014;39:487–98. doi:10.3233/JAD-130470.

95. Schwenk M, Zieschang T, Englert S, Grewal G, Najafi B, Hauer K. Improvements in gait characteristics after intensive resistance and functional training in people with dementia: A randomised controlled trial. *BMC Geriatr*. 2014;14:73. doi:10.1186/1471-2318-14-73.
96. Kemoun G, Thibaud M, Roumagne N, Carette P, Albinet C, Toussaint L, et al. Effects of a physical training programme on cognitive function and walking efficiency in elderly persons with dementia. *Dement Geriatr Cogn Disord*. 2010;29:109–14. doi:10.1159/000272435.
98. Steinberg M, Leoutsakos J-MS, Podewils LJ, Lyketsos CG. Evaluation of a home-based exercise program in the treatment of Alzheimer's disease: The Maximizing Independence in Dementia (MIND) study. *Int J Geriatr Psychiatry*. 2009;24:680–5. doi:10.1002/gps.2175.
100. Werner C, Wiloth S, Lemke NC, Kronbach F, Jansen C-P, Oster P, et al. People with Dementia Can Learn Compensatory Movement Maneuvers for the Sit-to-Stand Task: A Randomized Controlled Trial. *J Alzheimers Dis*. 2017;60:107–20. doi:10.3233/JAD-170258.
105. Roach KE, Tappen RM, Kirk-Sanchez N, Williams CL, Loewenstein D. A randomized controlled trial of an activity specific exercise program for individuals with Alzheimer disease in long-term care settings. *J Geriatr Phys Ther*. 2011;34:50–6. doi:10.1519/JPT.0b013e31820aab9c.
106. Tappen RM, Roach KE, Applegate EB, Stowell P. Effect of a combined walking and conversation intervention on functional mobility of nursing home residents with Alzheimer disease. *Alzheimer Dis Assoc Disord*. 2000;14:196–201. doi:10.1097/00002093-200010000-00002.
107. Venturelli M, Scarsini R, Schena F. Six-month walking program changes cognitive and ADL performance in patients with Alzheimer. *Am J Alzheimers Dis Other Demen*. 2011;26:381–8. doi:10.1177/1533317511418956.
109. Pitkälä KH, Pöysti MM, Laakkonen M-L, Tilvis RS, Savikko N, Kautiainen H, Strandberg TE. Effects of the Finnish Alzheimer disease exercise trial (FINALEX): A randomized controlled trial. *JAMA Intern Med*. 2013;173:894–901. doi:10.1001/jamainternmed.2013.359.
112. Bossers WJR, van der Woude LHV, Boersma F, Hortobágyi T, Scherder EJA, van Heuvelen MJG. Comparison of Effect of Two Exercise Programs on Activities of Daily Living in Individuals with Dementia: A 9-Week Randomized, Controlled Trial. *J Am Geriatr Soc*. 2016;64:1258–66. doi:10.1111/jgs.14160.
113. Henskens M, Nauta IM, Drost KT, Scherder EJ. The effects of movement stimulation on activities of daily living performance and quality of life in nursing home residents with dementia: A randomized controlled trial. *Clin Interv Aging*. 2018;13:805–17. doi:10.2147/CIA.S160031.
124. Cott CA, Dawson P, Sidani S, Wells D. The effects of a walking/talking program on communication, ambulation, and functional status in residents with Alzheimer disease. *Alzheimer Dis Assoc Disord*. 2002;16:81–7. doi:10.1097/00002093-200204000-00005.
125. Pomeroy VM, Warren CM, Honeycombe C, Briggs RS, Wilkinson DG, Pickering RM, Steiner A. Mobility and dementia: Is physiotherapy treatment during respite care effective? *Int J Geriatr Psychiatry*. 1999;14:389–97. doi:10.1002/(SICI)1099-1166(199905)14:5<389::AID-GPS933>3.0.CO;2-8.
126. Schwenk M, Zieschang T, Oster P, Hauer K. Dual-task performances can be improved in patients with dementia: A randomized controlled trial. *Neurology*. 2010;74:1961–8. doi:10.1212/WNL.0b013e3181e39696.
